# Supplementary material for: The shifting of buffer crop repertoires in pre-industrial north-eastern Europe
Source: Sci Rep. 2025 Jan 29;15:3720. doi: 10.1038/s41598-025-87792-0 (PMC11779896; doi:10.1038/s41598-025-87792-0)
Supplement: Supplementary file 1 — Supplementary Material 1 [file 41598_2025_87792_MOESM1_ESM.xlsx]

## Sheet: RAW DATA (counts)
Context number	Site name	Dating	Earliest Date	Latest Date	Midpoint between dates	Inclusion	Latitude	Longitude	Avena sativa	Secale cereale	Panicum miliaceum	Fagopyrum esculentum	Cannabis sativa	Total	Temporal_bins	Reference
47	Vilūnų senovės gyvenvietė	48 cal BC – 110 cal AD	-48	110	31	Included	54.7006	24.2286		1				1	0-99	Pranckėnaitė E., 2021. Vilūnų neįtvirtintos gyvenvietės, Kaišiadorių r., Kruonio sen. dujotiekių jungties tarp Lenkijos ir Lietuvos (GIPL) vietoje 2020 m. detaliųjų archeologinių tyrimų ataskaita. LII-f. 1, b. 10219.
13	Grikapėdžio senovės gyvenvietė	28–235	28	235	131.5	Included	54.5774	24.1482			5			5	100-199	Primary
62	Antilgės piliakalnis	34–245	34	245	139.5	Included	55.5271	25.8908			25			25	100-199	Poškienė J., 2018. Antilgės piliakalnio (u.k. 3572), Utenos r. sav., Daugailių sen., Antilgės k., 2017 m. detaliųjų archeologinių tyrimų ataskaita. LIIRS, f. 1, b. 8355.
48	Vilūnų senovės gyvenvietė	70-216 cal AD	70	216	143	Included	54.7051	24.2057	1	1				2	100-199	Šatavičė E., 2021. Vilūnų (Purvininkų) senovės gyvenvietės (Kaišiadorių r.) 2020 m. detaliųjų archeologinių tyrimų ataskaita. LII-f. 1, b. 10042.
47	Vilūnų senovės gyvenvietė	No info; 1st c. BC-3th c. AD	-99	399	150	Included	54.7006	24.2286		4				4	100-199	Pranckėnaitė E., 2021. Vilūnų neįtvirtintos gyvenvietės, Kaišiadorių r., Kruonio sen. dujotiekių jungties tarp Lenkijos ir Lietuvos (GIPL) vietoje 2020 m. detaliųjų archeologinių tyrimų ataskaita. LII-f. 1, b. 10219.
39	Skudenių senovės gyvenvietė	2-3th c. AD, 128-204	128	204	166	Included	54.7602	24.4594			1			1	100-199	Piličiauskas G., 2021. Skudenių senovės gyvenvietės, Kaišiadorių r. sav., dujotiekių jungties tarp Lenkijos ir Lietuvos (GIPL) vietoje detaliųjų archeologinių tyrimų 2020 m. ataskaita. LII-f. 1, b. 10439.
39	Skudenių senovės gyvenvietė	133-240; 2-3th c. AD	133	240	186.5	Included	54.7602	24.4594		2	2			4	100-199	Piličiauskas G., 2021. Skudenių senovės gyvenvietės, Kaišiadorių r. sav., dujotiekių jungties tarp Lenkijos ir Lietuvos (GIPL) vietoje detaliųjų archeologinių tyrimų 2020 m. ataskaita. LII-f. 1, b. 10439.
10	Dzūkų senovės gyvenvietė	Whole settlement 1st c.-4th c. AD	1	399	200	Included	54.3009	23.3806	4		2			6	200-299	Kvizikevičius L., 2022. Dzūkų senovės gyvenvietės teritorijos, Dzūkų k., Būdviečio sen., Lazdijų r. sav., 2021 m. detaliųjų archeologinių tyrimų ataskaita. LIIB-f. 1, b. 10481.
39	Skudenių senovės gyvenvietė	2-3th c. AD	101	299	200	Included	54.7602	24.4594			4			4	200-299	Piličiauskas G., 2021. Skudenių senovės gyvenvietės, Kaišiadorių r. sav., dujotiekių jungties tarp Lenkijos ir Lietuvos (GIPL) vietoje detaliųjų archeologinių tyrimų 2020 m. ataskaita. LII-f. 1, b. 10439.
39	Skudenių senovės gyvenvietė	171-308; 2-3th c. AD	171	308	239.5	Included	54.7602	24.4594			3			3	200-299	Piličiauskas G., 2021. Skudenių senovės gyvenvietės, Kaišiadorių r. sav., dujotiekių jungties tarp Lenkijos ir Lietuvos (GIPL) vietoje detaliųjų archeologinių tyrimų 2020 m. ataskaita. LII-f. 1, b. 10439.
77	Bakšių senovės gyvenvietė	131-382 cal AD	131	382	256.5	Included	54.4381	24.0644		2				2	200-299	Minkevičius K., Vengalis R., Piličiauskienė G., Pranckėnaitė G., Račas J., Kisielienė D., 2024. Adaptability and resilience: Farming practices in Lithuania during the Roman Iron Age. Archaeologia Baltica, vol. 31, p. 44-62.
98	Lieporių 1 gyvenvietė	140-390 cal AD	140	390	265	Included	55.9038	23.2505		1				1	200-299	Minkevičius K., Vengalis R., Piličiauskienė G., Poškienė J., Pilkauskas M., Vėlius G., 2024. Agricultural development in the southeastern Baltic region from the late Bronze Age to the medieval period: a case study of Kernavė, southeast Lithuania. Vegetation History and Archaeobotany, 1-14.
48	Vilūnų senovės gyvenvietė	2-5th c.	101	499	300	Included	54.7051	24.2057	5	1				6	300-399	Šatavičė E., 2021. Vilūnų (Purvininkų) senovės gyvenvietės (Kaišiadorių r.) 2020 m. detaliųjų archeologinių tyrimų ataskaita. LII-f. 1, b. 10042.
77	Bakšių senovės gyvenvietė	3-4th c. AD	201	399	300	Included	54.4381	24.0644		4				4	300-399	Minkevičius K., Vengalis R., Piličiauskienė G., Pranckėnaitė G., Račas J., Kisielienė D., 2024. Adaptability and resilience: Farming practices in Lithuania during the Roman Iron Age. Archaeologia Baltica, vol. 31, p. 44-62.
82	Gabrieliškių piliakalnis	3-4th c.	201	399	300	Included	55.2947	23.1926		5429	145			5574	300-399	Lideikytė-Šopauskienė A., 1935. Javai iš Lietuvos piliakalnių. VDU Gamtos - matematikos f-to Darbai, 9(2), pp. 131–149.
82	Gabrieliškių piliakalnis	245-389 cal AD	256	401	328.5	Included	55.2947	23.1926	11					11	300-399	Lideikytė-Šopauskienė A., 1935. Javai iš Lietuvos piliakalnių. VDU Gamtos - matematikos f-to Darbai, 9(2), pp. 131–149.
10	Dzūkų senovės gyvenvietė	250–410 AD	250	410	330	Included	54.3009	23.3806			1			1	300-399	Kvizikevičius L., 2022. Dzūkų senovės gyvenvietės teritorijos, Dzūkų k., Būdviečio sen., Lazdijų r. sav., 2021 m. detaliųjų archeologinių tyrimų ataskaita. LIIB-f. 1, b. 10481.
37	Semeniškių gyvenvietė	3-5 c. AD	201	499	350	Included	54.866	24.8489	1	4				5	300-399	Vutkin P., 2021. Semeniškių senovės gyvenvietės (17192), Kernavės archeologinės vietovės (kodas 37320) teritorijų, Semeniškių k., Kernavės sen., Širvintų r. sav., 2021 m. detaliųjų archeologinių tyrimų ir archeologinių žvalgymų ataskaita. LII-f. 1, b. 9929.
98	Lieporių 1 gyvenvietė	4-5th c. AD	301	499	400	Included	55.9038	23.2505		1				1	400-499	Minkevičius K., Vengalis R., Piličiauskienė G., Poškienė J., Pilkauskas M., Vėlius G., 2024. Agricultural development in the southeastern Baltic region from the late Bronze Age to the medieval period: a case study of Kernavė, southeast Lithuania. Vegetation History
12	Gerulių piliakalnis	2/3th c.-7/8th c.	101	799	450	Included	54.5313	24.2706		2	1			3	400-499	Ziabreva V., 2018. Gerulių piliakalnio su gyvenviete (22609) ir jo apsaugos nuo fizinio poveikio teritorijos, Alytaus r. sav., Butrimonių sen., Gerulių k. 2018 m. detaliųjų ir žvalgomųjų archeologinių tyrimų ataskaita. LIIB-f.1, b. 9247.
54	Gedimino kalnas	429-495 cal AD	429	495	462	Included	54.6868	25.2915		3	2			5	400-499	Motuzaite Matuzeviciute G., Rusteikyte A., Minkevicius K., Zekaite M., Tamulynas L. From Bronze Age Hillfort to Capital City New Radiocarbon Dates and the First Archaeobotanical Investigation at the Vilnius Castle Hill. Acta Archaeologica, vol. 91, 2020, p. 47–60.
109	Kernavė (Aukuro kalnas)	408–541	408	541	474.5	Included	54.882	24.8512			?			0	400-499	Motuzaite Matuzevičiute G., Laužikas R. A Brief History of Brommcorn Millet Cultivation in Lithuania. Agronomy, vol. 13, 2023, 2171.
70	Senojo Tarpupio gyvenvietė	5-6th c.	401	599	500	Included	54.5555	25.004			7			7	500-599	Songaila E., 2020. Senojo tarpupio senovės gyvenvietės (33055), Senųjų Trakų sen., Trakų raj. sav., sklypo kadastro nr.4400-2380- 0033, 2018 m. žvalgomųjų archeologinių tyrimų ataskaita.
56	Gedimino kalnas	Middle of 1st millennium AD	500	500	500	Included	54.6868	25.2915			4			4	500-599	Motuzaite Matuzeviciute G., Rusteikyte A., Minkevicius K., Zekaite M., Tamulynas L. From Bronze Age Hillfort to Capital City New Radiocarbon Dates and the First Archaeobotanical Investigation at the Vilnius Castle Hill. Acta Archaeologica, vol. 91, 2020, p. 47–60.
95	Kernavės archeologinė vietovė	?; 6-7th c.	501	699	600	Included	54.8809	24.8495		12				12	500-599	Minkevičius K., Vengalis R., Piličiauskienė G., Poškienė J., Pilkauskas M., Vėlius G., 2024. Agricultural development in the southeastern Baltic region from the late Bronze Age to the medieval period: a case study of Kernavė, southeast Lithuania. Vegetation History
13	Gedimino kalnas	2nd half of 7th c.-1st half of 8th c.	650	725	687.5	Included	54.6868	25.2915	2	15	5			22	600-699	Žėkaitė M., 2020. Vilniaus piliavietės, vad. Gedimino kalnu, Pilies kalnu, Aukštutine ir Žemutine pilimi (141), Vilniaus m. sav., Vilniaus m. detaliųjų archeologinių tyrimų 2018-2019 m. ataskaita. LIIB-f. 1, b. 10227.
53	Senkapis (u.k. 4291)	7-8th c. AD	601	799	700	Included	56.0244	22.5643		3				3	600-699	Petrulis D., 2023. Staurylų k. senkapio (u.k. 4291), Telšių rajono sav., Tryškių sen., žvalgomųjų archeologinių ir archeologinių žvalgymų 2022 m. ataskaita. LII- f. 1, b. 10854.
89	Senosios Įpilties piliakalnis	662-770 cal AD	662	770	716	Included	56.1231	21.2466	2	111				113	600-699	Minkevičius K., Vengalis R., Piličiauskienė G., Poškienė J., Pilkauskas M., Vėlius G., 2024. Agricultural development in the southeastern Baltic region from the late Bronze Age to the medieval period: a case study of Kernavė, southeast Lithuania. Vegetation History
56	Gedimino kalnas	2nd half of 1st millennium AD	500	999	749.5	Included	54.6868	25.2915			2			2	600-699	Motuzaite Matuzeviciute G., Rusteikyte A., Minkevicius K., Zekaite M., Tamulynas L. From Bronze Age Hillfort to Capital City New Radiocarbon Dates and the First Archaeobotanical Investigation at the Vilnius Castle Hill. Acta Archaeologica, vol. 91, 2020, p. 47–60.
56	Gedimino kalnas	688-890; 731-890; 647-774 cal AD	647	890	768.5	Included	54.6868	25.2915	2	15	5			22	700-799	Motuzaite Matuzeviciute G., Rusteikyte A., Minkevicius K., Zekaite M., Tamulynas L. From Bronze Age Hillfort to Capital City New Radiocarbon Dates and the First Archaeobotanical Investigation at the Vilnius Castle Hill. Acta Archaeologica, vol. 91, 2020, p. 47–60.
43	Tarbiškių senovės gyvenvietė	675-876 AD	675	876	775.5	Included	54.8212	24.7718			1			1	700-799	Piličiauskas G., 2021. Tarbiškių senovės gyvenviečių, Elektrėnų sav., dujotiekių jungties tarp Lenkijos ir Lietuvos (GIPL) vietoje, 2020 m. detalųjų archeologinių tyrimų ataskaita. LII-f. 1, b. 10441.
63	Apuolės piliakalnis	8-9th c. AD	701	899	800	Included	56.2463	21.6786		12				12	800-899	Sadauskas J., 2019. Apuolės piliakalnio su gyvenviete (24505) Skuodo r., Aleksandrijos sen., Apuolės k. detaliųjų ir žvalgomųjų archeologinių tyrimų 2018 m. ataskaita. Klaipėda.
13	Gedimino kalnas	8-9th c.?	701	899	800	Included	54.6868	25.2915	1		3			4	800-899	Žėkaitė M., 2020. Vilniaus piliavietės, vad. Gedimino kalnu, Pilies kalnu, Aukštutine ir Žemutine pilimi (141), Vilniaus m. sav., Vilniaus m. detaliųjų archeologinių tyrimų 2018-2019 m. ataskaita. LIIB-f. 1, b. 10227.
89	Senosios Įpilties piliakalnis	777-986 cal AD	777	986	881.5	Included	56.1231	21.2466		58				58	800-899	Minkevičius K., Vengalis R., Piličiauskienė G., Poškienė J., Pilkauskas M., Vėlius G., 2024. Agricultural development in the southeastern Baltic region from the late Bronze Age to the medieval period: a case study of Kernavė, southeast Lithuania. Vegetation History
95	Kernavės archeologinė vietovė	777-986 cal AD	777	986	881.5	Included	54.8809	24.8495		4				4	800-899	Minkevičius K., Vengalis R., Piličiauskienė G., Poškienė J., Pilkauskas M., Vėlius G., 2024. Agricultural development in the southeastern Baltic region from the late Bronze Age to the medieval period: a case study of Kernavė, southeast Lithuania. Vegetation History
79	Bilionių piliakalnis su gyvenviete	773-1011 cal AD	773	1011	892	Included	55.5969	22.3214		77	1			78	800-899	Minkevičius K., 2019. Bilionių piliakalnio archeobotaninė medžiaga. In: Bilionių piliakalnis - nauji Žemaitijos istorijos faktai, eds. (G. Zabiela).
95	Kernavės archeologinė vietovė	?; 9-10th c.	801	999	900	Included	54.8809	24.8495		5				5	900-999	Minkevičius K., Vengalis R., Piličiauskienė G., Poškienė J., Pilkauskas M., Vėlius G., 2024. Agricultural development in the southeastern Baltic region from the late Bronze Age to the medieval period: a case study of Kernavė, southeast Lithuania. Vegetation History
88	Imbarės piliakalnis su gyvenviete	895-1021 cal AD	895	1021	958	Included	56.0263	21.5561		92				92	900-999	Minkevičius K., Vengalis R., Piličiauskienė G., Poškienė J., Pilkauskas M., Vėlius G., 2024. Agricultural development in the southeastern Baltic region from the late Bronze Age to the medieval period: a case study of Kernavė, southeast Lithuania. Vegetation History
40	Strumbagalvės senovės gyvenvietė	896–1031	896	1031	963.5	Included	54.2734	23.375	1		3			4	900-999	Kvizikevičius L., 2022. Strumbagalvės senovės gyvenvietės teritorijos, Lazdijų r. sav., Būdviečio sen., Strumbagalvės k., 2021 m. detaliųjų archeologinių tyrimų ataskaita. LII- f. 1, b. 10769.
72	Vaitkuškio piliakalnio papėdės gyvenvietė	9-12th c. AD	801	1199	1000	Included	55.2052	24.7867		1				1	1000-1099	Rutkovski S., Vutkin P., 2019. Vaitkuškio piliakalnio papėdės gyvenvietė. In: Zabiela, G. (red.) Archeologiniai tyrinėjimai Lietuvoje 2018 metais. Vilnius: Lietuvos archeologijos draugija, pp. 68–70.
63	Apuolės piliakalnis	End of 1st millennium - begining of 2nd millennium	999	1001	1000	Included	56.2463	21.6786		5				5	1000-1099	Sadauskas J., 2019. Apuolės piliakalnio su gyvenviete (24505) Skuodo r., Aleksandrijos sen., Apuolės k. detaliųjų ir žvalgomųjų archeologinių tyrimų 2018 m. ataskaita. Klaipėda.	Grikpėdis M., 2021. Kultūrinių augalų kilmė Lietuvoje Rytų Baltijos regiono kontekste (archeobotanikos duomenimis iki XIV a.). Daktaro disertacija. Vilnius
83	Imbarės piliakalnis	Most likely begining of 2nd millenium	1001	1001	1001	Included	56.0263	21.5561	1	1545	1			1547	1000-1099	Minkevičius K., Vengalis R., Piličiauskienė G., Poškienė J., Pilkauskas M., Vėlius G., 2024. Agricultural development in the southeastern Baltic region from the late Bronze Age to the medieval period: a case study of Kernavė, southeast Lithuania. Vegetation History
13	Gedimino kalnas	Begining of 2nd millennium	1001	1001	1001	Included	54.6868	25.2915			2			2	1000-1099	Žėkaitė M., 2020. Vilniaus piliavietės, vad. Gedimino kalnu, Pilies kalnu, Aukštutine ir Žemutine pilimi (141), Vilniaus m. sav., Vilniaus m. detaliųjų archeologinių tyrimų 2018-2019 m. ataskaita. LIIB-f. 1, b. 10227.
107	Paverknių piliakalnis	1043-1161 cal AD	1043	1161	1102	Included	54.6069	24.0853	13	20				33	1100-1199	Minkevičius K., Vengalis R., Piličiauskienė G., Poškienė J., Pilkauskas M., Vėlius G., 2024. Agricultural development in the southeastern Baltic region from the late Bronze Age to the medieval period: a case study of Kernavė, southeast Lithuania. Vegetation History
99	Mažulionių piliakalnis	1021-1153 cal AD	1021	1153	1087	Included	55.3027	26.2355		312	38			350	1100-1199	Minkevičius K., Vengalis R., Piličiauskienė G., Poškienė J., Pilkauskas M., Vėlius G., 2024. Agricultural development in the southeastern Baltic region from the late Bronze Age to the medieval period: a case study of Kernavė, southeast Lithuania. Vegetation History
90	Ivangėnų piliakalnis su gyvenviete	1028-1184 cal AD	1028	1184	1106	Included	55.4221	22.6044		5				5	1100-1199	Minkevičius K., Vengalis R., Piličiauskienė G., Poškienė J., Pilkauskas M., Vėlius G., 2024. Agricultural development in the southeastern Baltic region from the late Bronze Age to the medieval period: a case study of Kernavė, southeast Lithuania. Vegetation History
90	Ivangėnų piliakalnis su gyvenviete	No info, 10-14th c.	901	1399	1150	Included	55.4221	22.6044		17				17	1100-1199	Minkevičius K., Vengalis R., Piličiauskienė G., Poškienė J., Pilkauskas M., Vėlius G., 2024. Agricultural development in the southeastern Baltic region from the late Bronze Age to the medieval period: a case study of Kernavė, southeast Lithuania. Vegetation History
13	Gedimino kalnas	2nd half of 12th c.- 1st part of 13th c.	1150	1225	1187.5	Included	54.6868	25.2915		2	1			3	1100-1199	Žėkaitė M., 2020. Vilniaus piliavietės, vad. Gedimino kalnu, Pilies kalnu, Aukštutine ir Žemutine pilimi (141), Vilniaus m. sav., Vilniaus m. detaliųjų archeologinių tyrimų 2018-2019 m. ataskaita. LIIB-f. 1, b. 10227.
56	Gedimino kalnas	1156-1228 cal AD	1156	1228	1192	Included	54.6868	25.2915		2	1			3	1100-1199	Motuzaite Matuzeviciute G., Rusteikyte A., Minkevicius K., Zekaite M., Tamulynas L. From Bronze Age Hillfort to Capital City New Radiocarbon Dates and the First Archaeobotanical Investigation at the Vilnius Castle Hill. Acta Archaeologica, vol. 91, 2020, p. 47–60.
54	Gedimino kalnas	1168–1227 cal AD	1168	1227	1197.5	Included	54.6868	25.2915		3	2			5	1100-1199	Motuzaite Matuzeviciute G., Rusteikyte A., Minkevicius K., Zekaite M., Tamulynas L. From Bronze Age Hillfort to Capital City New Radiocarbon Dates and the First Archaeobotanical Investigation at the Vilnius Castle Hill. Acta Archaeologica, vol. 91, 2020, p. 47–60.
102	Nemenčinės piliakalnis	Begining of 2nd millenium-14th c.	1001	1399	1200	Included	54.8608	25.4735		35	105			140	1200-1299	Minkevičius K., 2020. Žemdirbystės raida ir gyvenviečių dinamika Lietuvoje XI a. pr. Kr. - XII a. (archeobotaninių tyrimų duomenimis). Daktaro disertacija. Vilnius
72	Vaitkuškio piliakalnio papėdės gyvenvietė	11-14th c. AD	1001	1399	1200	Included	55.2052	24.7867		4	50			54	1200-1299	Rutkovski S., Vutkin P., 2019. Vaitkuškio piliakalnio papėdės gyvenvietė. In: Zabiela, G. (red.) Archeologiniai tyrinėjimai Lietuvoje 2018 metais. Vilnius: Lietuvos archeologijos draugija, pp. 68–70.	Grikpėdis M., 2021. Kultūrinių augalų kilmė Lietuvoje Rytų Baltijos regiono kontekste (archeobotanikos duomenimis iki XIV a.). Daktaro disertacija. Vilnius
53	Gedimino kalnas	1184-1283 AD	1184	1283	1233.5	Included	54.6868	25.2915			5			5	1200-1299	Motuzaite Matuzeviciute G., Rusteikyte A., Minkevicius K., Zekaite M., Tamulynas L. From Bronze Age Hillfort to Capital City New Radiocarbon Dates and the First Archaeobotanical Investigation at the Vilnius Castle Hill. Acta Archaeologica, vol. 91, 2020, p. 47–60.
8	Diržonių senovės gyvenvietė	12-14th c.	1101	1399	1250	Included	54.8462	24.8325		1	1			2	1200-1299	Dobeikienė J., 2022. Diržonių senovės gyvenvietės teritorijos, Diržonių k., Kazokiškių sen., Elektrėnų sav. 2020 m. detaliųjų archeologinių tyrimų ataskaita.
21	Kernavės piliakalniai	Middle of 13th c.	1250	1250	1250	Included	54.8827	24.8515			24			24	1200-1299	Vengalis R., 2020. Kernavės piliakalnių ir jų aplinkos (Širvintų r. sav., Kernavės sen.) archeologinių tyrimų 2018 m. ataskaita. LIIB-f. 1, b. 10327.
53	Gedimino kalnas	13th century AD	1201	1299	1250	Included	54.6868	25.2915		2				2	1200-1299	Motuzaite Matuzeviciute G., Rusteikyte A., Minkevicius K., Zekaite M., Tamulynas L. From Bronze Age Hillfort to Capital City New Radiocarbon Dates and the First Archaeobotanical Investigation at the Vilnius Castle Hill. Acta Archaeologica, vol. 91, 2020, p. 47–60.
56	Gedimino kalnas	1st half of 2nd millennium AD	1001	1500	1250.5	Included	54.6868	25.2915			3			3	1200-1299	Motuzaite Matuzeviciute G., Rusteikyte A., Minkevicius K., Zekaite M., Tamulynas L. From Bronze Age Hillfort to Capital City New Radiocarbon Dates and the First Archaeobotanical Investigation at the Vilnius Castle Hill. Acta Archaeologica, vol. 91, 2020, p. 47–60.
61	Alytaus piliakalnio papėdė	1211-1294 cal AD	1211	1294	1252.5	Included	54.3966	24.0802		1	14			15	1200-1299	Kontrimas D., 2017. Alytaus piliakalnio su gyvenviete (22599) teritorijos, Alytaus m. sav., Alytaus m., detaliųjų archeologinių tyrimų 2016 m. ataskaita. LIIRS, f. 1, b. 7824
4	Arsenalo g. 5	1259-1281 AD; 1240-1287 AD	1240	1287	1263.5	Included	54.6868	25.2899		7		2		9	1200-1299	Gubinas V., 2022. Vilniaus piliakalnio su papiliais ir gyvenviete (664), Vilniaus senojo miesto ir priemiesčių archeologinės vietovės (25504), Vilniaus senamiesčio (16073) teritorijų, Vilniaus m., sav., Vilniaus m., Arsenalo g. 5, žvalgomųjų archeologinių tyrimų ir archeologinių žvalgymų 2021 m. ataskaita.
55	Gedimino kalnas	1281-1294 cal AD	1281	1294	1287.5	Included	54.6868	25.2915		2	13			15	1200-1299	Motuzaite Matuzeviciute G., Rusteikyte A., Minkevicius K., Zekaite M., Tamulynas L. From Bronze Age Hillfort to Capital City New Radiocarbon Dates and the First Archaeobotanical Investigation at the Vilnius Castle Hill. Acta Archaeologica, vol. 91, 2020, p. 47–60.
48	Valdoų rūmai	End of 13th c.	1299	1299	1299	Included	54.6862	25.289		85	151			236	1200-1299	Buitkutė E., Motuzaitė Matuzevičiūtė G., 2018. Medinio pastato Vilniaus Žemutinės pilies teritorijoje paskirtis ekofaktinių tyrimų duomenimis. Archaeologia Lituana vol. 19, p. 194–206.
3	Arsenalo g. 5	13th?-14th c.	1201	1399	1300	Included	54.6869	25.2974	2	253	57	2		314	1300-1399	Baltramiejūnienė D., 2022. Vilniaus senamiesčio (16073), Vilniaus senojo miesto ir priemiesčių archeologinės vietovės (25504), Vilniaus piliakalnio su papiliais ir gyvenviete (664) teritorijos, Vilniaus piliakalnio su papiliais ir gyvenviete piliakalnio, vad. Kreivuoju kalnu, Plikuoju kalnu, Trijų kryžių kalnu (30357), Vilniaus m. sav., Vilniaus m., Arsenalo g. 5 2022 m. archeologinių žvalgomųjų …
53	Gedimino kalnas	End of 13th c.-beginning of 14th c. AD	1299	1301	1300	Included	54.6868	25.2915		6	5			11	1300-1399	Motuzaite Matuzeviciute G., Rusteikyte A., Minkevicius K., Zekaite M., Tamulynas L. From Bronze Age Hillfort to Capital City New Radiocarbon Dates and the First Archaeobotanical Investigation at the Vilnius Castle Hill. Acta Archaeologica, vol. 91, 2020, p. 47–60.
14	Gedimino kalnas	13th c.- begining of 15th c.	1201	1401	1301	Included	54.6868	25.2915	4	8	9			21	1300-1399	Kontrimas D., 2020. Vilniaus piliavietės, vad. Gedimino kalnu, Pilies kalnu, Aukštutine ir Žemutine pilimi (141), teritorijos, Vilniaus m. sav., Vilniaus m. detaliųjų archeologinių tyrimų 2019 m. ataskaita. LIIB-f. 1, b. 9459.
47	Vilūnų senovės gyvenvietė	1265–1384 cal AD	1265	1384	1324.5	Included	54.7006	24.2286		2				2	1300-1399	Pranckėnaitė E., 2021. Vilūnų neįtvirtintos gyvenvietės, Kaišiadorių r., Kruonio sen. dujotiekių jungties tarp Lenkijos ir Lietuvos (GIPL) vietoje 2020 m. detaliųjų archeologinių tyrimų ataskaita. LII-f. 1, b. 10219.
13	Gedimino kalnas	2nd half of 13th c.-14th c.	1250	1399	1324.5	Included	54.6868	25.2915		2	15			17	1300-1399	Žėkaitė M., 2020. Vilniaus piliavietės, vad. Gedimino kalnu, Pilies kalnu, Aukštutine ir Žemutine pilimi (141), Vilniaus m. sav., Vilniaus m. detaliųjų archeologinių tyrimų 2018-2019 m. ataskaita. LIIB-f. 1, b. 10227.
12	Gedimino kalnas	1st half of 14th c.	1301	1350	1325.5	Included	54.6868	25.2915		2	1			3	1300-1399	Kontrimas D., 2021. Vilniaus piliavietės, vad. Gedimino kalnu, Pilies kalnu, Aukštutine ir Žemutine pilimi (141) teritorijos, Vilniaus m. sav., Vilniaus m. detaliųjų archeologinių tyrimų 2020 m. ataskaita. LIIB-f. 1, b. 10201.
95	Kernavės archeologinė vietovė	1271-1391 cal AD	1271	1391	1331	Included	54.8809	24.8495		4				4	1300-1399	Minkevičius K., Vengalis R., Piličiauskienė G., Poškienė J., Pilkauskas M., Vėlius G., 2024. Agricultural development in the southeastern Baltic region from the late Bronze Age to the medieval period: a case study of Kernavė, southeast Lithuania. Vegetation History and Archaeobotany, 1-14.
100	Maišiagalos piliakalnis	13-14th c.	1280	1384	1332	Included	54.8665	25.0636	8	5811		331		6150	1300-1399	Minkevičius K., Vengalis R., Piličiauskienė G., Poškienė J., Pilkauskas M., Vėlius G., 2024. Agricultural development in the southeastern Baltic region from the late Bronze Age to the medieval period: a case study of Kernavė, southeast Lithuania. Vegetation History and Archaeobotany, 1-14.
95	Kernavės archeologinė vietovė	?; 13-14th c.	1280	1384	1332	Included	54.8809	24.8495		2				2	1300-1399	Minkevičius K., Vengalis R., Piličiauskienė G., Poškienė J., Pilkauskas M., Vėlius G., 2024. Agricultural development in the southeastern Baltic region from the late Bronze Age to the medieval period: a case study of Kernavė, southeast Lithuania. Vegetation History and Archaeobotany, 1-14.
94	Kernavės archeologinė vietovė (Mindaugo sostas)	1276-1392 cal AD	1276	1392	1334	Included	54.8831	24.8526		11		9615		9626	1300-1399	Minkevičius K., Vengalis R., Piličiauskienė G., Poškienė J., Pilkauskas M., Vėlius G., 2024. Agricultural development in the southeastern Baltic region from the late Bronze Age to the medieval period: a case study of Kernavė, southeast Lithuania. Vegetation History and Archaeobotany, 1-14.
47	Valdoų rūmai	2nd half of 14th c.	1350	1399	1374.5	Included	54.6862	25.289		1	5		1	7	1300-1399	Stančikaitė M., Kisielienė D., Mažeika J., Blaževičius P., 2008. Environmental conditions and human interference during the 6th and 13th-15th centuries A.D. at Vilnius Lower Castle, east Lithuania. Vegetation History and Archaeobotany Vol. 17, p. 239–250.
47	Valdoų rūmai	End of 14th c.	1399	1399	1399	Included	54.6862	25.289			5		3	8	1300-1399	Stančikaitė M., Kisielienė D., Mažeika J., Blaževičius P., 2008. Environmental conditions and human interference during the 6th and 13th-15th centuries A.D. at Vilnius Lower Castle, east Lithuania. Vegetation History and Archaeobotany Vol. 17, p. 239–250.
106	Veliuonos piliakalnis	? 14-15th c.	1301	1499	1400	Included	55.0773	23.2814		70				70	1400-1499	Minkevičius K., Vengalis R., Piličiauskienė G., Poškienė J., Pilkauskas M., Vėlius G., 2024. Agricultural development in the southeastern Baltic region from the late Bronze Age to the medieval period: a case study of Kernavė, southeast Lithuania. Vegetation History and Archaeobotany, 1-14.
106	Veliuonos piliakalnis	? 14-15th c.	1301	1499	1400	Included	55.0773	23.2814		2053	2			2055	1400-1499	Minkevičius K., Vengalis R., Piličiauskienė G., Poškienė J., Pilkauskas M., Vėlius G., 2024. Agricultural development in the southeastern Baltic region from the late Bronze Age to the medieval period: a case study of Kernavė, southeast Lithuania. Vegetation History and Archaeobotany, 1-14.
14	Jakniškių objektas	14-15th c.	1301	1499	1400	Included	54.6733	24.1874	1	13				14	1400-1499	Primary
11	Didžioji g. 3	14-15th c.	1301	1499	1400	Included	54.6805	25.2885	3	2				5	1400-1499	Muralis V., 2023. Vilniaus senojo miesto ir priemiesčių archeologinės vietovės (u.k. 25504) ir Pastato (u.k. 1049) teritorijos, Viliaus m. sav., Vilniaus m., Didžioji g. 3 detaliųjų archeologinių tyrimų 2022 m. ataskaita.
52	Bokšto g. 6	1320-1484	1320	1484	1402	Included	54.6806	25.2905		1000		500		1500	1400-1499	Motuzaitė Matuzevičiūtė G., Jonaitis R., Kaplūnaitė I., 2017. Ūkinio pastato, stovėjusioCivitas Rutenica kvartale, archeobotaniniai tyrimai: kitataučių kasdienybė Vilniaus miesto aplinkoje XIV a. pabaigoje - XV a. I pusėje. In Lituanistica vol. 63, issue 4(110), p. 219-233.
55	Švenčionių dvaras	15th c.	1401	1499	1450	Included	55.1349	26.1576		4	1			5	1400-1499	Čičiurkaitė I., 2023. Švenčionių dvaro vietos ir jo aplinkos (Švenčionys, Mokyklos g.) žvalgomųjų archeologinių tyrimų ir archeologinių žvalgymų 2022 m. ataskaita. LII- f. 1, b. 11004.
42	T. Daugirdo g. 1, Kaunas	End of 15th c.-begining of 16th c.	1499	1501	1500	Included	54.8951	23.8844		1				1	1500-1599	Poška T., 2020. Kauno senamiesčio (u. k. 20171), rūsių komplekso (30532), T. Daugirdo g. 1, Kauno m. sav., Kauno m., detaliųjų archeologinių tyrimų ir archeologinių žvalgymų 2019 m. ataskaita. LII- f. 1, b. 9574.
56	Kražių miestelio istorinės dalis	15-17th c.	1401	1699	1550	Included	55.6007	22.6897	6	4				10	1500-1599	Primary
32	Dominikonų g. 11	15-17th.	1401	1699	1550	Included	54.6812	25.2855	4	8				12	1500-1599	Žvirblys A., 2023. Vilniaus senamiesčio (kodas 16073), Vilniaus senojo miesto ir priemiesčių archeologinės vietovės (kodas 25504), pastatų komplekso vad. Pociejų rūmais (kodas 280) teritorijos, Vilniaus m. sav., Vilniaus m., Dominikonų g. 11 detaliųjų ir žvalgomųjų archeologinių tyrimų, archeologinių žvalgymų 2019-2020 m. ataskaita. LII-f. 1, b. 10751.
49	Rusų g. 5	16th c.	1501	1599	1550	Included	54.6815	25.2915		3		55	2	60	1500-1599	Indrulėnaitė-Šimanauskienė V., Girlevičius L., Motuzaitė Matuzevičiūtė G., 2022. Rusų gatvės 5 Vilniuje gyventojų mityba ir paleoaplinka (XVI–XVIII amžiais) archeobotaninių tyrimų bei istorinių šaltinių duomenimis. Archaeologia Lituana, vol. 23, p. 218-236. Archaeologia Lituana, vol. 23, p. 218-236.
49	Vingrėnų kaimavietė	No info; middle of 15th c.-1st half of 17th c.	1450	1699	1574.5	Included	54.2474	23.3884	11	9				20	1500-1599	Kvizikevičius L., 2022. Vingrėnų kaimavietės, sen., Lazdijų r. sav., Būdviečio sen., Vingrėnų k., 2021 m. detaliųjų archeologinių tyrimų ataskaita. LII-f. 1, b. 10935.
49	Rusų g. 5	16th c.-1st half of 17th c.	1501	1650	1575.5	Included	54.6815	25.2915		4	20	115	14	153	1500-1599	Indrulėnaitė-Šimanauskienė V., Girlevičius L., Motuzaitė Matuzevičiūtė G., 2022. Rusų gatvės 5 Vilniuje gyventojų mityba ir paleoaplinka (XVI–XVIII amžiais) archeobotaninių tyrimų bei istorinių šaltinių duomenimis. Archaeologia Lituana, vol. 23, p. 218-236.
23	Kloninių Mijaugonių dvarvietė	16-17th c.	1501	1699	1600	Included	54.7919	24.6101		15		6		21	1600-1699	Dobeikienė J., 2021. Kloninių Mijaugonių dvarvietės ir senovės gyvenvietės teritorijų Kloninių Mijaugonių k., Gilučių sen., Elektrėnų sav. 2020 m. detalųjų archeologinių tyrimų ataskaita. LII- f. 1, b. 10101.
50	Zapyškio senojo miesto vieta	16th c.?-17th c.	1501	1699	1600	Included	54.9288	23.6541		10		216	137	363	1600-1699	Šatavičė E., 2021. Zapyškio senojo miesto vietos (17226) ir Zapyškio Šv. Jono Krikštytojo bažnyčios (972) teritorijų, Muziejaus g., Zapyškio mstl., Kauno r. sav., 2020 m. žvalgomųjų archeologinių tyrimų ir žvalgymų ataskaita. LII-f. 1, b. 10151.
5	Arsenalo g. 1	16-17th c.	1501	1699	1600	Included	54.6873	25.2892		1	1			2	1600-1699	Kavaliauskas A., 2021. Vilniaus pilių teritorijos su įtvirtinimais, pastatais ir jų liekanomis (1791), kiemo priešais Pilininko namą (24707) (Arsenalo g. 1, Vilnius) 2019 m. detaliųjų archeologinių tyrimų ataskaita. LIIB - f. 1, b. 9973.
32	Dominikonų g. 11	16-17th c.	1501	1699	1600	Included	54.6812	25.2855		2		2		4	1600-1699	Žvirblys A., 2023. Vilniaus senamiesčio (kodas 16073), Vilniaus senojo miesto ir priemiesčių archeologinės vietovės (kodas 25504), pastatų komplekso vad. Pociejų rūmais (kodas 280) teritorijos, Vilniaus m. sav., Vilniaus m., Dominikonų g. 11 detaliųjų ir žvalgomųjų archeologinių tyrimų, archeologinių žvalgymų 2019-2020 m. ataskaita. LII-f. 1, b. 10751.
19	Polocko g. 7A	16-17th c.	1501	1699	1600	Included	54.6812	25.302	3	4				7	1600-1699	Šležas A., 2022. Vilniaus senamiesčio (u.k. 16073) ir Vilniaus senojo miesto ir priemiesčių archeologinės vietovės (u.k. 25504) teritorijų, Polocko g. 7A 2021 m. detaliųjų archeologinių tyrimų ataskaita. LL-f. 1, b. 10346.
21	Sodų g. 6	16-17th c.	1501	1699	1600	Included	54.6734	25.284	1					1	1600-1699	Vasiliauskas L., 2022. Vilniaus senamiesčio (16073) teritorijos, Sodų g. 6, 2019-2020 m. detaliųjų archeologinių tyrimų ir žvalgymų ataskaita. LII-f.1, b. 10388.
31	Vilniaus g. 24	16-17th c.	1501	1699	1600	Included	54.6838	25.2798	4	3				7	1600-1699	Tetereva D., 2022. Vilniaus Jonušo Radvilos rūmų pastatų kompleksas (752), Vilniaus g. 24, Vilniaus m, 2020 m. detaliųjų archeologinių tyrimų ataskaita. LII-f. 1, b. 10821.
39	Vasario 16-osios g.	?; 16-17th c.	1501	1699	1600	Included	54.6891	25.2726	8	3		2		13	1600-1699	Primary
42	Vanagėlio g. 11, 18	16-17th c.	1501	1699	1600	Included	54.6737	25.2947		7				7	1600-1699	Primary
23	Šv. Stepono g. 33, 35A	End of 16th c.-begining of 17th c.	1599	1601	1600	Included	54.6704	25.2786		1			2	3	1600-1699	Veževičienė V., 2022. Vilniaus miesto istorinės dalies, vad. Naujamiesčiu (33653) ir Vilniaus senojo miesto ir priemiesčių archeologinės vietovės (25504) teritorijos Šv. Stepono g. 33, 35A archeologinių žvalgymų ir detaliųjų tyrimų 2020-2021 m. ataskaita.
26	Upės g. 21	2nd half of 16th c.-17th c.	1550	1699	1624.5	Included	54.6956	25.2601		89		96		185	1600-1699	Motuzaitė Matuzevičiūtė Keen G., 2017. Vilniaus senamiesčio (16073) apsaugos teritorijoje, Upės g. 21 archeologinių detaliųjų tyrimų 2016 m.
8	J. Basanavičiaus g. 10	End of 16th c.-middle of 17th c.	1599	1650	1624.5	Included	54.6801	25.2748	303	4		8		315	1600-1699	Masiulienė I., 2021. Vilniaus senamiesčio (16073) teritorijos, Vilniaus m. sav., Vilniaus m., J. Basanavičiaus g. 10, detaliųjų archeologinių tyrimų 2020 m. ataskaita. LIIB- f. 1, b. 9843.
23	Šv. Stepono g. 33, 35A	1st half of 17th c.	1601	1650	1625.5	Included	54.6704	25.2786		2				2	1600-1699	Veževičienė V., 2022. Vilniaus miesto istorinės dalies, vad. Naujamiesčiu (33653) ir Vilniaus senojo miesto ir priemiesčių archeologinės vietovės (25504) teritorijos Šv. Stepono g. 33, 35A archeologinių žvalgymų ir detaliųjų tyrimų 2020-2021 m. ataskaita.
1	A. Juozapavičiaus g. 23, Alytus	16?-18th c.	1501	1799	1650	Included	54.4033	24.0615			1	1		2	1600-1699	Gubinas V., 2021. Alytaus senojo miesto vietoje (33722), A. Juozapavičiaus g. 20, 23, 23A, 34A, Jiezno g. 3, Kalnų g. 8, Kreivoji g. 20, Merkinơs g. 10 ir Ramybės g. 21, Alytaus m., Alytaus m. sav., vykdytų detaliųkų archeologinių ir žvalgomųkų archeologinių tyrimų 2021 m. ataskaita. LIIB – f. 1, b. 10577.
45	Vydūno g. 1, 7, Jurbarkas	17th c.	1601	1699	1650	Included	55.0771	22.7604		1				1	1600-1699	Šimanauskas T., 2023. Jurbarko miesto istorinio centro (17085), Jurbarko rajono sav., Jurbarko miesto sen., Jurbarko m., Vydūno g. 1, 7, 2022 m. žvalgomųjų archeologinių tyrimų ir archeologinių žvalgymų ataskaita. LII- f. 1, b. 10731.
16	Klaipėdos g. 9	17th c.	1601	1699	1650	Included	54.6817	25.2796	1	7				8	1600-1699	Zaremba P., 2021. Vilniaus senamiesčio (16073), Vilniaus senojo miesto su priemiesčiais archeologinės vietovės (25504), Oskierkų rūmų pastatų komplekso (42854) teritorijos, Vilniaus m. sav., Vilniaus m., Klaipėdos g. 9 detaliųjų archeologinių tyrimų 2020–2021 metais ataskaita.
35	Pylimo g. 7	17th c.	1601	1699	1650	Included	54.6815	25.2748	7	6				13	1600-1699	Primary
40	Aguonų g. 17	17th c.	1601	1699	1650	Included	54.6747	25.2772		2		8	2	12	1600-1699	Primary
41	Baltasis skr. 8	17th c.	1601	1699	1650	Included	54.6819	25.303	3	11				14	1600-1699	Valauskas M., 2023. Vilniaus senamiesčio (16073), Vilniaus senojo miesto ir priemiesčių archeologinės vietovės (25504) teritorijos, Vilniaus m. sav., Vilniaus m., Baltasis skg. 8 detaliųjų archeologinių tyrimų 2022 metais ataskaita. LII-f.1, b. 10960.
43	Aguonų g. 22	17th c.	1601	1699	1650	Included	54.6743	25.2779		3		1157	38	1198	1600-1699	Primary
51	Bokšto g. 10	Middle of 17th c.	1650	1650	1650	Included	54.6797	25.2907	86	2200		500		2786	1600-1699	Primary
29	Vilniaus g. 41	2nd half of 17th c.	1650	1699	1674.5	Included	54.6815	25.2807	208	21				229	1600-1699	Rutkovski S., 2023. Vilniaus senamiesčio (16073), Vilniaus senojo miesto ir priemiesčių archeologinės vietovės (25504), Mažųjų Radvilų rūmų (644) teritorijų, Vilniaus g. 41 2022 m. detaliųjų archeologinių tyrimų ataskaita.
44	Vilniaus g. 41A	?; End of 16th c.-18th c.	1599	1799	1699	Included	54.6809	25.2806				8		8	1600-1699	Primary
57	Naujojo Uosto g. 3, Klaipėda	16-19th c.	1501	1899	1700	Included	55.7089	21.1275	1	10				11	1700-1799	Lekniutė A., 2023. Klaipėdos senojo miesto vietos su priemiesčiais (27077), miesto istorinės dalies, vad. Naujamiesčiu (22012) teritorijų, Klaipėdos m. sav., Klaipėdos m., Naujoji Uosto g. 3, 2023 m. žvalgomųjų archeologinių tyrimų ataskaita. LII-f. 1, b. 11038.
32	Palangos g. 7 Kaunas	17-18th c.	1601	1799	1700	Included	54.8956	23.8944		1				1	1700-1799	Šležas A., 2021. Kauno senamiesčio (kodas 20171) teritorijos 2021 m. detaliųjų archeologinių tyrimų Kauno m., Palangos g. 7 ataskaita. LII-f. 1, b. 10050.
35	Prienų dvarvietė	17-18th c.	1601	1799	1700	Included	54.6292	23.9486	4					4	1700-1799	Primary
36	S. Dariaus ir S. Girėno g. 4, Birštonas	17-18th c.	1601	1799	1700	Included	54.6037	24.0323		5		8		13	1700-1799	Primary
37	Bazilijonų g. 3	(16)17-19th c.	1501	1899	1700	Included	54.674	25.2876	2	48		1		51	1700-1799	Primary
1	Antakalnio g. 26B	17-18th c.	1601	1799	1700	Included	54.6991	25.3083	4					4	1700-1799	Mačiulis M., 2023. Vilniaus miesto istorinės dalies vad. Antakalniu (16084) teritorijos, Antakalnio g. 26B 2022 metų žvalgomųjų archeologinių tyrimų ataskaita.
33	Vingrių g.	17-18th c.	1601	1799	1700	Included	54.6787	25.2765	1	3		52	13	69	1700-1799	Mačiulis M., 2021. Vilniaus senojo miesto su priemiesčiais archeologinės vietovės (25504), Vilniaus senamiesčio (16073), Vingrių šaltinių vandenvietės vietos (30598), transformatorinės pastato (30600) teritorijų, Vingrių g. 9, 2021 metų detaliųjų archeologinių tyrimų ir žvalgymų ataskaita. LII- f. 1, b. 10420.
36	Algirdo g. 48C	17-18th c.	1601	1799	1700	Included	54.6687	25.2745		2		1		3	1700-1799	Primary
38	Vilniaus g. 33	17-18th c.	1601	1799	1700	Included	54.6835	25.2792	2	7				9	1700-1799	Mačiulis M., 2023. Vilniaus senojo miesto su priemiesčiais archeologinės vietovės (25504), Vilniaus senamiesčio (16073), Ryšių rūmų (15889) teritorijų Vilniaus g. 33, 2022 metų archeologinių žvalgomųjų ir detaliųjų tyrimų ataskaita. LII-f.1, b. 10986.
30	J. Jasinskio g. 14	2nd half of 17th c. - 1st half of 18th c.	1650	1750	1700	Included	54.6872	25.2629				16		16	1700-1799	Šatavičė E., 2021. Vilniaus miesto istorinės dalies, vad. Naujamiesčiu (33653) teritorijos, Vilniaus m. sav., Vilniaus m., Jasinskio g. 14 detaliųjų archeologinių tyrimų ir žvalgymų 2020 m. ataskaita. LII-f.1, b. 10152.
23	Šv. Stepono g. 33, 35A	End of 17th c.-begining of 18th c.	1699	1701	1700	Included	54.6704	25.2786		5				5	1700-1799	Veževičienė V., 2022. Vilniaus miesto istorinės dalies, vad. Naujamiesčiu (33653) ir Vilniaus senojo miesto ir priemiesčių archeologinės vietovės (25504) teritorijos Šv. Stepono g. 33, 35A archeologinių žvalgymų ir detaliųjų tyrimų 2020-2021 m. ataskaita.
27	Linginės kaimavietė	17th c.-begining of 19th c.	1601	1801	1701	Included	55.719	24.2185		40				40	1700-1799	Račas J., 2022. Linginės kaimavietės Panevėžio r. sav., Naujamiesčio sen., Lakštingalų k. 2021 m. detaliųjų archeologinių tyrimų ataskaita. LII-f. 1, b. 10394.
17	Liejyklos g. 8	17-18th c.; AMS 1640-?	1640	1799	1719.5	Included	54.6836	25.283		1450	2			1452	1700-1799	Žukovskis R., 2020. Vilniaus senojo miesto vietos su priemiesčiais (25504), Vilniaus m. sav., Vilniaus m., Liejyklos g. 8 detaliųjų archeloginių tyrimų 2018 m. ataskaita. LII-f. 1, b. 9768.
6	Arsenalo g. 1	2nd half of 17th-18th c.	1650	1799	1724.5	Included	54.6873	25.2892	1	2		37	2	42	1700-1799	Indrulėnaitė-Šimanauskienė V., 2022. Vilniaus senojo miesto ir priemiesčių archeologinės vietovės (25504), Vilniaus senamiesčio (16073), Arkikatedros bazilikos, Žemutinės ir Aukštutinės pilių pastatų, jų liekanų ir kitų statinių komplekso (642), Vilniaus piliavietės, vad. Gedimino kalnu, Pilies kalnu, Aukštutine ir Žemutine pilimi (141) teritorijų, Arsenalo g. 1 2022 m. detaliųjų archeologinių ty…
49	Rusų g. 5	2nd half of 17th c.-18th c.	1650	1799	1724.5	Included	54.6815	25.2915		17	10	62	16	105	1700-1799	Indrulėnaitė-Šimanauskienė V., Girlevičius L., Motuzaitė Matuzevičiūtė G., 2022. Rusų gatvės 5 Vilniuje gyventojų mityba ir paleoaplinka (XVI–XVIII amžiais) archeobotaninių tyrimų bei istorinių šaltinių duomenimis. Archaeologia Lituana, vol. 23, p. 218-236.
34	Pylimo g. 7	AMS 1697-1911; 17-18th c.	1697	1799	1748	Included	54.6815	25.2748		7	13	119	4	143	1700-1799	Primary
18	Plačioji g. 4	End of 17th c.-18th c.	1699	1799	1749	Included	54.6756	25.2817	8	1				9	1700-1799	Kvizikevičius L., 2021. Vilniaus senojo miesto vietos su priemiesčiais (u.k. 25504) ir Vilniaus senamiesčio (16073) teritorijos Plačioji g. 4 detaliųjų archeologijos tyrimų 2017-2018 m. ataskaita.
27	Užupio g. 15A	End of 17th c.-18th c.	1699	1799	1749	Included	54.6802	25.2969					1	1	1700-1799	Muralis V., 2023. Vilniaus miesto istorinės dalies, vadinamos Senamiesčiu (u. k. 16073), Vilniaus senojo miesto vietos su priemiesčiais (u. k. 25504) ir Vilniaus Šv. Baltramiejaus bažnyčios statinių komplekso (u. k. 28128) teritorijos, sklype kartu su Klebonijos pastatu (u. k. 28130) Užupio g. 15A Vilniuje, detaliųjų archeologinių tyrimų 2022 m. ataskaita.
41	Šv. Gertrūdos g., Kaunas	17-19th c.	1601	1899	1750	Included	54.8986	23.8933				3	10	13	1700-1799	Vingis V., 2021. Kauno senamiestyje (20171) Kauno m. sav., Kauno m., Jonavos g. 3, 20, M. Daukšos g. 44, Šv. Gertrūdos g. 14, 2021 m. archeologinių žvalgymų ataskaita. LII-f. 1, b. 10380.
41	Šv. Gertrūdos g., Kaunas	17-19th c.	1601	1899	1750	Included	54.8986	23.8933				188		188	1700-1799	Vingis V., 2021. Kauno senamiestyje (20171) Kauno m. sav., Kauno m., Jonavos g. 3, 20, M. Daukšos g. 44, Šv. Gertrūdos g. 14, 2021 m. archeologinių žvalgymų ataskaita. LII-f. 1, b. 10380.
49	Rusų g. 5	18th c.	1701	1799	1750	Included	54.6815	25.2915					1	1	1700-1799	Indrulėnaitė-Šimanauskienė V., Girlevičius L., Motuzaitė Matuzevičiūtė G., 2022. Rusų gatvės 5 Vilniuje gyventojų mityba ir paleoaplinka (XVI–XVIII amžiais) archeobotaninių tyrimų bei istorinių šaltinių duomenimis. Archaeologia Lituana, vol. 23, p. 218-236.
32	Dominikonų g. 11	18th.	1701	1799	1750	Included	54.6812	25.2855				500		500	1700-1799	Žvirblys A., 2023. Vilniaus senamiesčio (kodas 16073), Vilniaus senojo miesto ir priemiesčių archeologinės vietovės (kodas 25504), pastatų komplekso vad. Pociejų rūmais (kodas 280) teritorijos, Vilniaus m. sav., Vilniaus m., Dominikonų g. 11 detaliųjų ir žvalgomųjų archeologinių tyrimų, archeologinių žvalgymų 2019-2020 m. ataskaita. LII-f. 1, b. 10751.
32	Dominikonų g. 11	18th c.	1701	1799	1750	Included	54.6812	25.2855		1				1	1700-1799	Žvirblys A., 2023. Vilniaus senamiesčio (kodas 16073), Vilniaus senojo miesto ir priemiesčių archeologinės vietovės (kodas 25504), pastatų komplekso vad. Pociejų rūmais (kodas 280) teritorijos, Vilniaus m. sav., Vilniaus m., Dominikonų g. 11 detaliųjų ir žvalgomųjų archeologinių tyrimų, archeologinių žvalgymų 2019-2020 m. ataskaita. LII-f. 1, b. 10751.
20	Pranciškonų g. 4A	18th c.	1701	1799	1750	Included	54.6797	25.2816					1	1	1700-1799	Veževičienė V., 2016. Vilniaus senamiesčio (16073) teritorijos, Pranciškonų g. 4a 2015 m. detaliųjų archeologinių tyrimų ataskaita.
28	Vilniaus g. 41	18th c.	1701	1799	1750	Included	54.6815	25.2807	870	969				1839	1700-1799	Kvizikevičius L., 2022. Vilniaus senamiesčio (16073), Vilniaus senojo miesto ir priemiesčių archeologinės vietovės (25504), Mažųjų Radvilų rūmų (644) teritorijų, Vilniaus g. 41 2021-2022 m. detaliųjų archeologinių tyrimų ir žvalgymų ataskaita.
54	Vydūno al. 33 B, Vilkija	2nd half of 18th c.-begining of 19th c.	1750	1801	1775.5	Included	55.0401	23.5749	1	1				2	1700-1799	Muralis V., 2023. Vilkijos (u.k. 17123) ir Vilkijos senojo miesto vietos (u.k. 23759) teritorijų, Vydūno al. 33, 33A, 33B, Vilkijos m., Kauno r. sav., 2022 metų detaliųjų archeologinių tyrimų, žvalgomųjų archeologinių tyrimų ir žvalgymų ataskaita. LII-f. 1, b. 10836.
2	Anykščių bažnyčia	End of 18th c.	1799	1799	1799	Included	55.5244	25.1003		4				4	1700-1799	Zabiela G., 2020. Anykščių Šv. Apaštalo Evangelisto Mato bažnyčios statinių komplekso (32801) teritorijos (Anykščiai, Vilniaus g. 8) 2020 m. detaliųjų archeologinių tyrimų ataskaita. LIIB - f. 1, b. 9932.
22	Sodų g. 23	18-20th c.	1701	1999	1850	Included	54.6713	25.2816	3					3	1700-1799	Mačiulis M., 2022. Vilniaus senojo miesto su priemiesčiais archeologinės vietovės (25504), Vilniaus senamiesčio (16073) teritorijų Sodų g. 23 2022 metų žvalgomųjų archeologinių tyrimų ataskaita. LII-f. 1, b.10452.
9	Bazilijonų g. 3	19th c.	1801	1899	1850	Included	54.674	25.2876	3					3	1700-1799	Bajarūnas T., 2022. Vilniaus senamiesčio (16073), Vilniaus senojo miesto su priemiesčiais archeologinės vietovės (25504), pastato (43845) teritorijų, Vilniaus m. sav., Vilniaus m., Bazilijonų g. 3 2021 m. detaliųjų archeologinių tyrimų ataskaita

## Sheet: PERCENTAGE DATA %
Context number	Site name	Dating	Earliest Date	Latest Date	Midpoint between dates	Inclusion	Latitude	Longitude	Avena sativa	Secale cereale	Panicum miliaceum	Fagopyrum esculentum	Cannabis sativa	Total	Temporal_bins	Reference
47	Vilūnų senovės gyvenvietė	48 cal BC – 110 cal AD	-48	110	31	Included	54.7006	24.2286	0	100	0	0	0	100	0-99	Pranckėnaitė E., 2021. Vilūnų neįtvirtintos gyvenvietės, Kaišiadorių r., Kruonio sen. dujotiekių jungties tarp Lenkijos ir Lietuvos (GIPL) vietoje 2020 m. detaliųjų archeologinių tyrimų ataskaita. LII-f. 1, b. 10219.
13	Grikapėdžio senovės gyvenvietė	28–235	28	235	131.5	Included	54.5774	24.1482	0	0	100	0	0	100	100-199	Primary
62	Antilgės piliakalnis	34–245	34	245	139.5	Included	55.5271	25.8908	0	0	100	0	0	100	100-199	Poškienė J., 2018. Antilgės piliakalnio (u.k. 3572), Utenos r. sav., Daugailių sen., Antilgės k., 2017 m. detaliųjų archeologinių tyrimų ataskaita. LIIRS, f. 1, b. 8355.
48	Vilūnų senovės gyvenvietė	70-216 cal AD	70	216	143	Included	54.7051	24.2057	50	50	0	0	0	100	100-199	Šatavičė E., 2021. Vilūnų (Purvininkų) senovės gyvenvietės (Kaišiadorių r.) 2020 m. detaliųjų archeologinių tyrimų ataskaita. LII-f. 1, b. 10042.
47	Vilūnų senovės gyvenvietė	No info; 1st c. BC-3th c. AD	-99	399	150	Included	54.7006	24.2286	0	100	0	0	0	100	100-199	Pranckėnaitė E., 2021. Vilūnų neįtvirtintos gyvenvietės, Kaišiadorių r., Kruonio sen. dujotiekių jungties tarp Lenkijos ir Lietuvos (GIPL) vietoje 2020 m. detaliųjų archeologinių tyrimų ataskaita. LII-f. 1, b. 10219.
39	Skudenių senovės gyvenvietė	2-3th c. AD, 128-204	128	204	166	Included	54.7602	24.4594	0	0	100	0	0	100	100-199	Piličiauskas G., 2021. Skudenių senovės gyvenvietės, Kaišiadorių r. sav., dujotiekių jungties tarp Lenkijos ir Lietuvos (GIPL) vietoje detaliųjų archeologinių tyrimų 2020 m. ataskaita. LII-f. 1, b. 10439.
39	Skudenių senovės gyvenvietė	133-240; 2-3th c. AD	133	240	186.5	Included	54.7602	24.4594	0	50	50	0	0	100	100-199	Piličiauskas G., 2021. Skudenių senovės gyvenvietės, Kaišiadorių r. sav., dujotiekių jungties tarp Lenkijos ir Lietuvos (GIPL) vietoje detaliųjų archeologinių tyrimų 2020 m. ataskaita. LII-f. 1, b. 10439.
10	Dzūkų senovės gyvenvietė	Whole settlement 1st c.-4th c. AD	1	399	200	Included	54.3009	23.3806	66.6667	0	33.3333	0	0	100	200-299	Kvizikevičius L., 2022. Dzūkų senovės gyvenvietės teritorijos, Dzūkų k., Būdviečio sen., Lazdijų r. sav., 2021 m. detaliųjų archeologinių tyrimų ataskaita. LIIB-f. 1, b. 10481.
39	Skudenių senovės gyvenvietė	2-3th c. AD	101	299	200	Included	54.7602	24.4594	0	0	100	0	0	100	200-299	Piličiauskas G., 2021. Skudenių senovės gyvenvietės, Kaišiadorių r. sav., dujotiekių jungties tarp Lenkijos ir Lietuvos (GIPL) vietoje detaliųjų archeologinių tyrimų 2020 m. ataskaita. LII-f. 1, b. 10439.
39	Skudenių senovės gyvenvietė	171-308; 2-3th c. AD	171	308	239.5	Included	54.7602	24.4594	0	0	100	0	0	100	200-299	Piličiauskas G., 2021. Skudenių senovės gyvenvietės, Kaišiadorių r. sav., dujotiekių jungties tarp Lenkijos ir Lietuvos (GIPL) vietoje detaliųjų archeologinių tyrimų 2020 m. ataskaita. LII-f. 1, b. 10439.
14
77	Bakšių senovės gyvenvietė	131-382 cal AD	131	382	256.5	Included	54.4381	24.0644	0	100	0	0	0	100	200-299	Minkevičius K., Vengalis R., Piličiauskienė G., Pranckėnaitė G., Račas J., Kisielienė D., 2024. Adaptability and resilience: Farming practices in Lithuania during the Roman Iron Age. Archaeologia Baltica, vol. 31, p. 44-62.
98	Lieporių 1 gyvenvietė	140-390 cal AD	140	390	265	Included	55.9038	23.2505	0	100	0	0	0	100	200-299	Minkevičius K., Vengalis R., Piličiauskienė G., Poškienė J., Pilkauskas M., Vėlius G., 2024. Agricultural development in the southeastern Baltic region from the late Bronze Age to the medieval period: a case study of
48	Vilūnų senovės gyvenvietė	2-5th c.	101	499	300	Included	54.7051	24.2057	83.3333	16.6667	0	0	0	100	300-399	Šatavičė E., 2021. Vilūnų (Purvininkų) senovės gyvenvietės (Kaišiadorių r.) 2020 m. detaliųjų archeologinių tyrimų ataskaita. LII-f. 1, b. 10042.
77	Bakšių senovės gyvenvietė	3-4th c. AD	201	399	300	Included	54.4381	24.0644	0	100	0	0	0	100	300-399	Minkevičius K., Vengalis R., Piličiauskienė G., Poškienė J., Pilkauskas M., Vėlius G., 2024. Agricultural development in the southeastern Baltic region from the late Bronze Age to the medieval period: a case study of
82	Gabrieliškių piliakalnis	3-4th c.	201	399	300	Included	55.2947	23.1926	0	97.3986	2.60136	0	0	100	300-399	Lideikytė-Šopauskienė A., 1935. Javai iš Lietuvos piliakalnių. VDU Gamtos - matematikos f-to Darbai, 9(2), pp. 131–149.
82	Gabrieliškių piliakalnis	245-389 cal AD	256	401	328.5	Included	55.2947	23.1926	100	0	0	0	0	100	300-399	Lideikytė-Šopauskienė A., 1935. Javai iš Lietuvos piliakalnių. VDU Gamtos - matematikos f-to Darbai, 9(2), pp. 131–149.
10	Dzūkų senovės gyvenvietė	250–410 AD	250	410	330	Included	54.3009	23.3806	0	0	100	0	0	100	300-399	Kvizikevičius L., 2022. Dzūkų senovės gyvenvietės teritorijos, Dzūkų k., Būdviečio sen., Lazdijų r. sav., 2021 m. detaliųjų archeologinių tyrimų ataskaita. LIIB-f. 1, b. 10481.
37	Semeniškių gyvenvietė	3-5 c. AD	201	499	350	Included	54.866	24.8489	20	80	0	0	0	100	300-399	Vutkin P., 2021. Semeniškių senovės gyvenvietės (17192), Kernavės archeologinės vietovės (kodas 37320) teritorijų, Semeniškių k., Kernavės sen., Širvintų r. sav., 2021 m. detaliųjų archeologinių tyrimų ir archeologinių žvalgymų ataskaita. LII-f. 1, b. 9929.
98	Lieporių 1 gyvenvietė	4-5th c. AD	301	499	400	Included	55.9038	23.2505	0	100	0	0	0	100	400-499	Minkevičius K., 2020. Žemdirbystės raida ir gyvenviečių dinamika Lietuvoje XI a. pr. Kr. - XII a. (archeobotaninių tyrimų duomenimis). Daktaro disertacija. Vilnius
12	Gerulių piliakalnis	2/3th c.-7/8th c.	101	799	450	Included	54.5313	24.2706	0	66.6667	33.3333	0	0	100	400-499	Ziabreva V., 2018. Gerulių piliakalnio su gyvenviete (22609) ir jo apsaugos nuo fizinio poveikio teritorijos, Alytaus r. sav., Butrimonių sen., Gerulių k. 2018 m. detaliųjų ir žvalgomųjų archeologinių tyrimų ataskaita. LIIB-f.1, b. 9247.
54	Gedimino kalnas	429-495 cal AD	429	495	462	Included	54.6868	25.2915	0	60	40	0	0	100	400-499	Motuzaite Matuzeviciute G., Rusteikyte A., Minkevicius K., Zekaite M., Tamulynas L. From Bronze Age Hillfort to Capital City New Radiocarbon Dates and the First Archaeobotanical Investigation at the Vilnius Castle Hill. Acta Archaeologica, vol. 91, 2020, p. 47–60.
109	Kernavė (Aukuro kalnas)	408–541	408	541	474.5	Included	54.882	24.8512							400-499	Motuzaite Matuzevičiute G., Laužikas R. A Brief History of Brommcorn Millet Cultivation in Lithuania. Agronomy, vol. 13, 2023, 2171.
70	Senojo Tarpupio gyvenvietė	5-6th c.	401	599	500	Included	54.5555	25.004	0	0	100	0	0	100	500-599	Songaila E., 2020. Senojo tarpupio senovės gyvenvietės (33055), Senųjų Trakų sen., Trakų raj. sav., sklypo kadastro nr.4400-2380- 0033, 2018 m. žvalgomųjų archeologinių tyrimų ataskaita.
56	Gedimino kalnas	Middle of 1st millennium AD	500	500	500	Included	54.6868	25.2915	0	0	100	0	0	100	500-599	Motuzaite Matuzeviciute G., Rusteikyte A., Minkevicius K., Zekaite M., Tamulynas L. From Bronze Age Hillfort to Capital City New Radiocarbon Dates and the First Archaeobotanical Investigation at the Vilnius Castle Hill. Acta Archaeologica, vol. 91, 2020, p. 47–60.
95	Kernavės archeologinė vietovė	?; 6-7th c.	501	699	600	Included	54.8809	24.8495	0	100	0	0	0	100	500-599	Minkevičius K., Vengalis R., Piličiauskienė G., Poškienė J., Pilkauskas M., Vėlius G., 2024. Agricultural development in the southeastern Baltic region from the late Bronze Age to the medieval period: a case study of Kernavė, southeast Lithuania. Vegetation History
13	Gedimino kalnas	2nd half of 7th c.-1st half of 8th c.	650	725	687.5	Included	54.6868	25.2915	9.09091	68.1818	22.7273	0	0	100	600-699	Žėkaitė M., 2020. Vilniaus piliavietės, vad. Gedimino kalnu, Pilies kalnu, Aukštutine ir Žemutine pilimi (141), Vilniaus m. sav., Vilniaus m. detaliųjų archeologinių tyrimų 2018-2019 m. ataskaita. LIIB-f. 1, b. 10227.
53	Senkapis (u.k. 4291)	7-8th c. AD	601	799	700	Included	56.0244	22.5643	0	100	0	0	0	100	600-699	Petrulis D., 2023. Staurylų k. senkapio (u.k. 4291), Telšių rajono sav., Tryškių sen., žvalgomųjų archeologinių ir archeologinių žvalgymų 2022 m. ataskaita. LII- f. 1, b. 10854.
89	Senosios Įpilties piliakalnis	662-770 cal AD	662	770	716	Included	56.1231	21.2466	1.76991	98.2301	0	0	0	100	600-699	Minkevičius K., Vengalis R., Piličiauskienė G., Poškienė J., Pilkauskas M., Vėlius G., 2024. Agricultural development in the southeastern Baltic region from the late Bronze Age to the medieval period: a case study of Kernavė, southeast Lithuania. Vegetation History
56	Gedimino kalnas	2nd half of 1st millennium AD	500	999	749.5	Included	54.6868	25.2915	0	0	100	0	0	100	600-699	Motuzaite Matuzeviciute G., Rusteikyte A., Minkevicius K., Zekaite M., Tamulynas L. From Bronze Age Hillfort to Capital City New Radiocarbon Dates and the First Archaeobotanical Investigation at the Vilnius Castle Hill. Acta Archaeologica, vol. 91, 2020, p. 47–60.
56	Gedimino kalnas	688-890; 731-890; 647-774 cal AD	647	890	768.5	Included	54.6868	25.2915	9.09091	68.1818	22.7273	0	0	100	700-799	Motuzaite Matuzeviciute G., Rusteikyte A., Minkevicius K., Zekaite M., Tamulynas L. From Bronze Age Hillfort to Capital City New Radiocarbon Dates and the First Archaeobotanical Investigation at the Vilnius Castle Hill. Acta Archaeologica, vol. 91, 2020, p. 47–60.
43	Tarbiškių senovės gyvenvietė	675-876 AD	675	876	775.5	Included	54.8212	24.7718	0	0	100	0	0	100	700-799	Piličiauskas G., 2021. Tarbiškių senovės gyvenviečių, Elektrėnų sav., dujotiekių jungties tarp Lenkijos ir Lietuvos (GIPL) vietoje, 2020 m. detalųjų archeologinių tyrimų ataskaita. LII-f. 1, b. 10441.
63	Apuolės piliakalnis	8-9th c. AD	701	899	800	Included	56.2463	21.6786	0	100	0	0	0	100	800-899	Sadauskas J., 2019. Apuolės piliakalnio su gyvenviete (24505) Skuodo r., Aleksandrijos sen., Apuolės k. detaliųjų ir žvalgomųjų archeologinių tyrimų 2018 m. ataskaita. Klaipėda.
13	Gedimino kalnas	8-9th c.?	701	899	800	Included	54.6868	25.2915	25	0	75	0	0	100	800-899	Žėkaitė M., 2020. Vilniaus piliavietės, vad. Gedimino kalnu, Pilies kalnu, Aukštutine ir Žemutine pilimi (141), Vilniaus m. sav., Vilniaus m. detaliųjų archeologinių tyrimų 2018-2019 m. ataskaita. LIIB-f. 1, b. 10227.
89	Senosios Įpilties piliakalnis	777-986 cal AD	777	986	881.5	Included	56.1231	21.2466	0	100	0	0	0	100	800-899	Minkevičius K., Vengalis R., Piličiauskienė G., Poškienė J., Pilkauskas M., Vėlius G., 2024. Agricultural development in the southeastern Baltic region from the late Bronze Age to the medieval period: a case study of Kernavė, southeast Lithuania. Vegetation History
95	Kernavės archeologinė vietovė	777-986 cal AD	777	986	881.5	Included	54.8809	24.8495	0	100	0	0	0	100	800-899	Minkevičius K., Vengalis R., Piličiauskienė G., Poškienė J., Pilkauskas M., Vėlius G., 2024. Agricultural development in the southeastern Baltic region from the late Bronze Age to the medieval period: a case study of Kernavė, southeast Lithuania. Vegetation History
79	Bilionių piliakalnis su gyvenviete	773-1011 cal AD	773	1011	892	Included	55.5969	22.3214	0	98.7179	1.28205	0	0	100	800-899	Minkevičius K., 2019. Bilionių piliakalnio archeobotaninė medžiaga. In: Bilionių piliakalnis - nauji Žemaitijos istorijos faktai, eds. (G. Zabiela).
95	Kernavės archeologinė vietovė	?; 9-10th c.	801	999	900	Included	54.8809	24.8495	0	100	0	0	0	100	900-999	Minkevičius K., Vengalis R., Piličiauskienė G., Poškienė J., Pilkauskas M., Vėlius G., 2024. Agricultural development in the southeastern Baltic region from the late Bronze Age to the medieval period: a case study of Kernavė, southeast Lithuania. Vegetation History
88	Imbarės piliakalnis su gyvenviete	895-1021 cal AD	895	1021	958	Included	56.0263	21.5561	0	100	0	0	0	100	900-999	Minkevičius K., Vengalis R., Piličiauskienė G., Poškienė J., Pilkauskas M., Vėlius G., 2024. Agricultural development in the southeastern Baltic region from the late Bronze Age to the medieval period: a case study of Kernavė, southeast Lithuania. Vegetation History
40	Strumbagalvės senovės gyvenvietė	896–1031	896	1031	963.5	Included	54.2734	23.375	25	0	75	0	0	100	900-999	Kvizikevičius L., 2022. Strumbagalvės senovės gyvenvietės teritorijos, Lazdijų r. sav., Būdviečio sen., Strumbagalvės k., 2021 m. detaliųjų archeologinių tyrimų ataskaita. LII- f. 1, b. 10769.
72	Vaitkuškio piliakalnio papėdės gyvenvietė	9-12th c. AD	801	1199	1000	Included	55.2052	24.7867	0	100	0	0	0	100	1000-1099	Rutkovski S., Vutkin P., 2019. Vaitkuškio piliakalnio papėdės gyvenvietė. In: Zabiela, G. (red.) Archeologiniai tyrinėjimai Lietuvoje 2018 metais. Vilnius: Lietuvos archeologijos draugija, pp. 68–70.
63	Apuolės piliakalnis	End of 1st millennium - begining of 2nd millennium	999	1001	1000	Included	56.2463	21.6786	0	100	0	0	0	100	1000-1099	Sadauskas J., 2019. Apuolės piliakalnio su gyvenviete (24505) Skuodo r., Aleksandrijos sen., Apuolės k. detaliųjų ir žvalgomųjų archeologinių tyrimų 2018 m. ataskaita. Klaipėda.	Grikpėdis M., 2021. Kultūrinių augalų kilmė Lietuvoje Rytų Baltijos regiono kontekste (archeobotanikos duomenimis iki XIV a.). Daktaro disertacija. Vilnius
83	Imbarės piliakalnis	Most likely begining of 2nd millenium	1001	1001	1001	Included	56.0263	21.5561	0.0646412	99.8707	0.0646412	0	0	100	1000-1099	Minkevičius K., Vengalis R., Piličiauskienė G., Poškienė J., Pilkauskas M., Vėlius G., 2024. Agricultural development in the southeastern Baltic region from the late Bronze Age to the medieval period: a case study of
13	Gedimino kalnas	Begining of 2nd millennium	1001	1001	1001	Included	54.6868	25.2915	0	0	100	0	0	100	1000-1099	Žėkaitė M., 2020. Vilniaus piliavietės, vad. Gedimino kalnu, Pilies kalnu, Aukštutine ir Žemutine pilimi (141), Vilniaus m. sav., Vilniaus m. detaliųjų archeologinių tyrimų 2018-2019 m. ataskaita. LIIB-f. 1, b. 10227.
107	Paverknių piliakalnis	1043-1161 cal AD	1043	1161	1102	Included	54.6069	24.0853	39.3939	60.6061	0	0	0	100	1100-1199	Minkevičius K., Vengalis R., Piličiauskienė G., Poškienė J., Pilkauskas M., Vėlius G., 2024. Agricultural development in the southeastern Baltic region from the late Bronze Age to the medieval period: a case study of Kernavė, southeast Lithuania. Vegetation History
99	Mažulionių piliakalnis	1021-1153 cal AD	1021	1153	1087	Included	55.3027	26.2355	0	89.1429	10.8571	0	0	100	1100-1199	Minkevičius K., Vengalis R., Piličiauskienė G., Poškienė J., Pilkauskas M., Vėlius G., 2024. Agricultural development in the southeastern Baltic region from the late Bronze Age to the medieval period: a case study of Kernavė, southeast Lithuania. Vegetation History
90	Ivangėnų piliakalnis su gyvenviete	1028-1184 cal AD	1028	1184	1106	Included	55.4221	22.6044	0	100	0	0	0	100	1100-1199	Minkevičius K., Vengalis R., Piličiauskienė G., Poškienė J., Pilkauskas M., Vėlius G., 2024. Agricultural development in the southeastern Baltic region from the late Bronze Age to the medieval period: a case study of Kernavė, southeast Lithuania. Vegetation History
90	Ivangėnų piliakalnis su gyvenviete	No info, 10-14th c.	901	1399	1150	Included	55.4221	22.6044	0	100	0	0	0	100	1100-1199	Minkevičius K., Vengalis R., Piličiauskienė G., Poškienė J., Pilkauskas M., Vėlius G., 2024. Agricultural development in the southeastern Baltic region from the late Bronze Age to the medieval period: a case study of Kernavė, southeast Lithuania. Vegetation History
13	Gedimino kalnas	2nd half of 12th c.- 1st part of 13th c.	1150	1225	1187.5	Included	54.6868	25.2915	0	66.6667	33.3333	0	0	100	1100-1199	Žėkaitė M., 2020. Vilniaus piliavietės, vad. Gedimino kalnu, Pilies kalnu, Aukštutine ir Žemutine pilimi (141), Vilniaus m. sav., Vilniaus m. detaliųjų archeologinių tyrimų 2018-2019 m. ataskaita. LIIB-f. 1, b. 10227.
56	Gedimino kalnas	1156-1228 cal AD	1156	1228	1192	Included	54.6868	25.2915	0	66.6667	33.3333	0	0	100	1100-1199	Motuzaite Matuzeviciute G., Rusteikyte A., Minkevicius K., Zekaite M., Tamulynas L. From Bronze Age Hillfort to Capital City New Radiocarbon Dates and the First Archaeobotanical Investigation at the Vilnius Castle Hill. Acta Archaeologica, vol. 91, 2020, p. 47–60.
54	Gedimino kalnas	1168–1227 cal AD	1168	1227	1197.5	Included	54.6868	25.2915	0	60	40	0	0	100	1100-1199	Motuzaite Matuzeviciute G., Rusteikyte A., Minkevicius K., Zekaite M., Tamulynas L. From Bronze Age Hillfort to Capital City New Radiocarbon Dates and the First Archaeobotanical Investigation at the Vilnius Castle Hill. Acta Archaeologica, vol. 91, 2020, p. 47–60.
102	Nemenčinės piliakalnis	Begining of 2nd millenium-14th c.	1001	1399	1200	Included	54.8608	25.4735	0	25	75	0	0	100	1200-1299	Minkevičius K., 2020. Žemdirbystės raida ir gyvenviečių dinamika Lietuvoje XI a. pr. Kr. - XII a. (archeobotaninių tyrimų duomenimis). Daktaro disertacija. Vilnius
72	Vaitkuškio piliakalnio papėdės gyvenvietė	11-14th c. AD	1001	1399	1200	Included	55.2052	24.7867	0	7.40741	92.5926	0	0	100	1200-1299	Rutkovski S., Vutkin P., 2019. Vaitkuškio piliakalnio papėdės gyvenvietė. In: Zabiela, G. (red.) Archeologiniai tyrinėjimai Lietuvoje 2018 metais. Vilnius: Lietuvos archeologijos draugija, pp. 68–70.	Grikpėdis M., 2021. Kultūrinių augalų kilmė Lietuvoje Rytų Baltijos regiono kontekste (archeobotanikos duomenimis iki XIV a.). Daktaro disertacija. Vilnius
53	Gedimino kalnas	1184-1283 AD	1184	1283	1233.5	Included	54.6868	25.2915	0	0	100	0	0	100	1200-1299	Motuzaite Matuzeviciute G., Rusteikyte A., Minkevicius K., Zekaite M., Tamulynas L. From Bronze Age Hillfort to Capital City New Radiocarbon Dates and the First Archaeobotanical Investigation at the Vilnius Castle Hill. Acta Archaeologica, vol. 91, 2020, p. 47–60.
8	Diržonių senovės gyvenvietė	12-14th c.	1101	1399	1250	Included	54.8462	24.8325	0	50	50	0	0	100	1200-1299	Dobeikienė J., 2022. Diržonių senovės gyvenvietės teritorijos, Diržonių k., Kazokiškių sen., Elektrėnų sav. 2020 m. detaliųjų archeologinių tyrimų ataskaita.
21	Kernavės piliakalniai	Middle of 13th c.	1250	1250	1250	Included	54.8827	24.8515	0	0	100	0	0	100	1200-1299	Vengalis R., 2020. Kernavės piliakalnių ir jų aplinkos (Širvintų r. sav., Kernavės sen.) archeologinių tyrimų 2018 m. ataskaita. LIIB-f. 1, b. 10327.
53	Gedimino kalnas	13th century AD	1201	1299	1250	Included	54.6868	25.2915	0	100	0	0	0	100	1200-1299	Motuzaite Matuzeviciute G., Rusteikyte A., Minkevicius K., Zekaite M., Tamulynas L. From Bronze Age Hillfort to Capital City New Radiocarbon Dates and the First Archaeobotanical Investigation at the Vilnius Castle Hill. Acta Archaeologica, vol. 91, 2020, p. 47–60.
56	Gedimino kalnas	1st half of 2nd millennium AD	1001	1500	1250.5	Included	54.6868	25.2915	0	0	100	0	0	100	1200-1299	Motuzaite Matuzeviciute G., Rusteikyte A., Minkevicius K., Zekaite M., Tamulynas L. From Bronze Age Hillfort to Capital City New Radiocarbon Dates and the First Archaeobotanical Investigation at the Vilnius Castle Hill. Acta Archaeologica, vol. 91, 2020, p. 47–60.
61	Alytaus piliakalnio papėdė	1211-1294 cal AD	1211	1294	1252.5	Included	54.3966	24.0802	0	6.66667	93.3333	0	0	100	1200-1299	Kontrimas D., 2017. Alytaus piliakalnio su gyvenviete (22599) teritorijos, Alytaus m. sav., Alytaus m., detaliųjų archeologinių tyrimų 2016 m. ataskaita. LIIRS, f. 1, b. 7824
4	Arsenalo g. 5	1259-1281 AD; 1240-1287 AD	1240	1287	1263.5	Included	54.6868	25.2899	0	77.7778	0	22.2222	0	100	1200-1299	Gubinas V., 2022. Vilniaus piliakalnio su papiliais ir gyvenviete (664), Vilniaus senojo miesto ir priemiesčių archeologinės vietovės (25504), Vilniaus senamiesčio (16073) teritorijų, Vilniaus m., sav., Vilniaus m., Arsenalo g. 5, žvalgomųjų archeologinių tyrimų ir archeologinių žvalgymų 2021 m. ataskaita.
55	Gedimino kalnas	1281-1294 cal AD	1281	1294	1287.5	Included	54.6868	25.2915	0	13.3333	86.6667	0	0	100	1200-1299	Motuzaite Matuzeviciute G., Rusteikyte A., Minkevicius K., Zekaite M., Tamulynas L. From Bronze Age Hillfort to Capital City New Radiocarbon Dates and the First Archaeobotanical Investigation at the Vilnius Castle Hill. Acta Archaeologica, vol. 91, 2020, p. 47–60.
48	Valdoų rūmai	End of 13th c.	1299	1299	1299	Included	54.6862	25.289	0	36.0169	63.9831	0	0	100	1200-1299	Buitkutė E., Motuzaitė Matuzevičiūtė G., 2018. Medinio pastato Vilniaus Žemutinės pilies teritorijoje paskirtis ekofaktinių tyrimų duomenimis. Archaeologia Lituana vol. 19, p. 194–206.
3	Arsenalo g. 5	13th?-14th c.	1201	1399	1300	Included	54.6869	25.2974	0.636943	80.5732	18.1529	0.636943	0	100	1300-1399	Baltramiejūnienė D., 2022. Vilniaus senamiesčio (16073), Vilniaus senojo miesto ir priemiesčių archeologinės vietovės (25504), Vilniaus piliakalnio su papiliais ir gyvenviete (664) teritorijos, Vilniaus piliakalnio su papiliais ir gyvenviete piliakalnio, vad. Kreivuoju kalnu, Plikuoju kalnu, Trijų kryžių kalnu (30357), Vilniaus m. sav., Vilniaus m., Arsenalo g. 5 2022 m. archeologinių žvalgomųjų …
53	Gedimino kalnas	End of 13th c.-beginning of 14th c. AD	1299	1301	1300	Included	54.6868	25.2915	0	54.5455	45.4545	0	0	100	1300-1399	Motuzaite Matuzeviciute G., Rusteikyte A., Minkevicius K., Zekaite M., Tamulynas L. From Bronze Age Hillfort to Capital City New Radiocarbon Dates and the First Archaeobotanical Investigation at the Vilnius Castle Hill. Acta Archaeologica, vol. 91, 2020, p. 47–60.
14	Gedimino kalnas	13th c.- begining of 15th c.	1201	1401	1301	Included	54.6868	25.2915	19.0476	38.0952	42.8571	0	0	100	1300-1399	Kontrimas D., 2020. Vilniaus piliavietės, vad. Gedimino kalnu, Pilies kalnu, Aukštutine ir Žemutine pilimi (141), teritorijos, Vilniaus m. sav., Vilniaus m. detaliųjų archeologinių tyrimų 2019 m. ataskaita. LIIB-f. 1, b. 9459.
47	Vilūnų senovės gyvenvietė	1265–1384 cal AD	1265	1384	1324.5	Included	54.7006	24.2286	0	100	0	0	0	100	1300-1399	Pranckėnaitė E., 2021. Vilūnų neįtvirtintos gyvenvietės, Kaišiadorių r., Kruonio sen. dujotiekių jungties tarp Lenkijos ir Lietuvos (GIPL) vietoje 2020 m. detaliųjų archeologinių tyrimų ataskaita. LII-f. 1, b. 10219.
13	Gedimino kalnas	2nd half of 13th c.-14th c.	1250	1399	1324.5	Included	54.6868	25.2915	0	11.7647	88.2353	0	0	100	1300-1399	Žėkaitė M., 2020. Vilniaus piliavietės, vad. Gedimino kalnu, Pilies kalnu, Aukštutine ir Žemutine pilimi (141), Vilniaus m. sav., Vilniaus m. detaliųjų archeologinių tyrimų 2018-2019 m. ataskaita. LIIB-f. 1, b. 10227.
12	Gedimino kalnas	1st half of 14th c.	1301	1350	1325.5	Included	54.6868	25.2915	0	66.6667	33.3333	0	0	100	1300-1399	Kontrimas D., 2021. Vilniaus piliavietės, vad. Gedimino kalnu, Pilies kalnu, Aukštutine ir Žemutine pilimi (141) teritorijos, Vilniaus m. sav., Vilniaus m. detaliųjų archeologinių tyrimų 2020 m. ataskaita. LIIB-f. 1, b. 10201.
95	Kernavės archeologinė vietovė	1271-1391 cal AD	1271	1391	1331	Included	54.8809	24.8495	0	100	0	0	0	100	1300-1399	Minkevičius K., Vengalis R., Piličiauskienė G., Poškienė J., Pilkauskas M., Vėlius G., 2024. Agricultural development in the southeastern Baltic region from the late Bronze Age to the medieval period: a case study of Kernavė, southeast Lithuania. Vegetation History and Archaeobotany, 1-14.
100	Maišiagalos piliakalnis	13-14th c.	1280	1384	1332	Included	54.8665	25.0636	0.130081	94.4878	0	5.38211	0	100	1300-1399	Minkevičius K., Vengalis R., Piličiauskienė G., Poškienė J., Pilkauskas M., Vėlius G., 2024. Agricultural development in the southeastern Baltic region from the late Bronze Age to the medieval period: a case study of Kernavė, southeast Lithuania. Vegetation History and Archaeobotany, 1-14.
95	Kernavės archeologinė vietovė	?; 13-14th c.	1280	1384	1332	Included	54.8809	24.8495	0	100	0	0	0	100	1300-1399	Minkevičius K., Vengalis R., Piličiauskienė G., Poškienė J., Pilkauskas M., Vėlius G., 2024. Agricultural development in the southeastern Baltic region from the late Bronze Age to the medieval period: a case study of Kernavė, southeast Lithuania. Vegetation History and Archaeobotany, 1-14.
94	Kernavės archeologinė vietovė (Mindaugo sostas)	1276-1392 cal AD	1276	1392	1334	Included	54.8831	24.8526	0	0.114274	0	99.8857	0	100	1300-1399	Minkevičius K., Vengalis R., Piličiauskienė G., Poškienė J., Pilkauskas M., Vėlius G., 2024. Agricultural development in the southeastern Baltic region from the late Bronze Age to the medieval period: a case study of Kernavė, southeast Lithuania. Vegetation History and Archaeobotany, 1-14.
47	Valdoų rūmai	2nd half of 14th c.	1350	1399	1374.5	Included	54.6862	25.289	0	14.2857	71.4286	0	14.2857	100	1300-1399	Stančikaitė M., Kisielienė D., Mažeika J., Blaževičius P., 2008. Environmental conditions and human interference during the 6th and 13th-15th centuries A.D. at Vilnius Lower Castle, east Lithuania. Vegetation History and Archaeobotany Vol. 17, p. 239–250.
47	Valdoų rūmai	End of 14th c.	1399	1399	1399	Included	54.6862	25.289	0	0	62.5	0	37.5	100	1300-1399	Stančikaitė M., Kisielienė D., Mažeika J., Blaževičius P., 2008. Environmental conditions and human interference during the 6th and 13th-15th centuries A.D. at Vilnius Lower Castle, east Lithuania. Vegetation History and Archaeobotany Vol. 17, p. 239–250.
106	Veliuonos piliakalnis	? 14-15th c.	1301	1499	1400	Included	55.0773	23.2814	0	100	0	0	0	100	1400-1499	Minkevičius K., Vengalis R., Piličiauskienė G., Poškienė J., Pilkauskas M., Vėlius G., 2024. Agricultural development in the southeastern Baltic region from the late Bronze Age to the medieval period: a case study of Kernavė, southeast Lithuania. Vegetation History and Archaeobotany, 1-14.
106	Veliuonos piliakalnis	? 14-15th c.	1301	1499	1400	Included	55.0773	23.2814	0	100	0.0974184	0	0	100.097	1400-1499	Minkevičius K., Vengalis R., Piličiauskienė G., Poškienė J., Pilkauskas M., Vėlius G., 2024. Agricultural development in the southeastern Baltic region from the late Bronze Age to the medieval period: a case study of Kernavė, southeast Lithuania. Vegetation History and Archaeobotany, 1-14.
14	Jakniškių objektas	14-15th c.	1301	1499	1400	Included	54.6733	24.1874	7.14286	92.8571	0	0	0	100	1400-1499	Primary
11	Didžioji g. 3	14-15th c.	1301	1499	1400	Included	54.6805	25.2885	60	40	0	0	0	100	1400-1499	Muralis V., 2023. Vilniaus senojo miesto ir priemiesčių archeologinės vietovės (u.k. 25504) ir Pastato (u.k. 1049) teritorijos, Viliaus m. sav., Vilniaus m., Didžioji g. 3 detaliųjų archeologinių tyrimų 2022 m. ataskaita.
52	Bokšto g. 6	1320-1484	1320	1484	1402	Included	54.6806	25.2905	0	66.6667	0	33.3333	0	100	1400-1499	Motuzaitė Matuzevičiūtė G., Jonaitis R., Kaplūnaitė I., 2017. Ūkinio pastato, stovėjusioCivitas Rutenica kvartale, archeobotaniniai tyrimai: kitataučių kasdienybė Vilniaus miesto aplinkoje XIV a. pabaigoje - XV a. I pusėje. In Lituanistica vol. 63, issue 4(110), p. 219-233.
55	Švenčionių dvaras	15th c.	1401	1499	1450	Included	55.1349	26.1576	0	80	20	0	0	100	1400-1499	Čičiurkaitė I., 2023. Švenčionių dvaro vietos ir jo aplinkos (Švenčionys, Mokyklos g.) žvalgomųjų archeologinių tyrimų ir archeologinių žvalgymų 2022 m. ataskaita. LII- f. 1, b. 11004.
42	T. Daugirdo g. 1, Kaunas	End of 15th c.-begining of 16th c.	1499	1501	1500	Included	54.8951	23.8844	0	100	0	0	0	100	1500-1599	Poška T., 2020. Kauno senamiesčio (u. k. 20171), rūsių komplekso (30532), T. Daugirdo g. 1, Kauno m. sav., Kauno m., detaliųjų archeologinių tyrimų ir archeologinių žvalgymų 2019 m. ataskaita. LII- f. 1, b. 9574.
56	Kražių miestelio istorinės dalis	15-17th c.	1401	1699	1550	Included	55.6007	22.6897	60	40	0	0	0	100	1500-1599	Primary
32	Dominikonų g. 11	15-17th.	1401	1699	1550	Included	54.6812	25.2855	33.3333	66.6667	0	0	0	100	1500-1599	Žvirblys A., 2023. Vilniaus senamiesčio (kodas 16073), Vilniaus senojo miesto ir priemiesčių archeologinės vietovės (kodas 25504), pastatų komplekso vad. Pociejų rūmais (kodas 280) teritorijos, Vilniaus m. sav., Vilniaus m., Dominikonų g. 11 detaliųjų ir žvalgomųjų archeologinių tyrimų, archeologinių žvalgymų 2019-2020 m. ataskaita. LII-f. 1, b. 10751.
49	Rusų g. 5	16th c.	1501	1599	1550	Included	54.6815	25.2915	0	5	0	91.6667	3.33333	100	1500-1599	Indrulėnaitė-Šimanauskienė V., Girlevičius L., Motuzaitė Matuzevičiūtė G., 2022. Rusų gatvės 5 Vilniuje gyventojų mityba ir paleoaplinka (XVI–XVIII amžiais) archeobotaninių tyrimų bei istorinių šaltinių duomenimis. Archaeologia Lituana, vol. 23, p. 218-236. Archaeologia Lituana, vol. 23, p. 218-236.
49	Vingrėnų kaimavietė	No info; middle of 15th c.-1st half of 17th c.	1450	1699	1574.5	Included	54.2474	23.3884	55	45	0	0	0	100	1500-1599	Kvizikevičius L., 2022. Vingrėnų kaimavietės, sen., Lazdijų r. sav., Būdviečio sen., Vingrėnų k., 2021 m. detaliųjų archeologinių tyrimų ataskaita. LII-f. 1, b. 10935.
49	Rusų g. 5	16th c.-1st half of 17th c.	1501	1650	1575.5	Included	54.6815	25.2915	0	2.61438	13.0719	75.1634	9.15033	100	1500-1599	Indrulėnaitė-Šimanauskienė V., Girlevičius L., Motuzaitė Matuzevičiūtė G., 2022. Rusų gatvės 5 Vilniuje gyventojų mityba ir paleoaplinka (XVI–XVIII amžiais) archeobotaninių tyrimų bei istorinių šaltinių duomenimis. Archaeologia Lituana, vol. 23, p. 218-236.
23	Kloninių Mijaugonių dvarvietė	16-17th c.	1501	1699	1600	Included	54.7919	24.6101	0	71.4286	0	28.5714	0	100	1600-1699	Dobeikienė J., 2021. Kloninių Mijaugonių dvarvietės ir senovės gyvenvietės teritorijų Kloninių Mijaugonių k., Gilučių sen., Elektrėnų sav. 2020 m. detalųjų archeologinių tyrimų ataskaita. LII- f. 1, b. 10101.
50	Zapyškio senojo miesto vieta	16th c.?-17th c.	1501	1699	1600	Included	54.9288	23.6541	0	2.75482	0	59.5041	37.741	100	1600-1699	Šatavičė E., 2021. Zapyškio senojo miesto vietos (17226) ir Zapyškio Šv. Jono Krikštytojo bažnyčios (972) teritorijų, Muziejaus g., Zapyškio mstl., Kauno r. sav., 2020 m. žvalgomųjų archeologinių tyrimų ir žvalgymų ataskaita. LII-f. 1, b. 10151.
5	Arsenalo g. 1	16-17th c.	1501	1699	1600	Included	54.6873	25.2892	0	50	50	0	0	100	1600-1699	Kavaliauskas A., 2021. Vilniaus pilių teritorijos su įtvirtinimais, pastatais ir jų liekanomis (1791), kiemo priešais Pilininko namą (24707) (Arsenalo g. 1, Vilnius) 2019 m. detaliųjų archeologinių tyrimų ataskaita. LIIB - f. 1, b. 9973.
32	Dominikonų g. 11	16-17th c.	1501	1699	1600	Included	54.6812	25.2855	0	50	0	50	0	100	1600-1699	Žvirblys A., 2023. Vilniaus senamiesčio (kodas 16073), Vilniaus senojo miesto ir priemiesčių archeologinės vietovės (kodas 25504), pastatų komplekso vad. Pociejų rūmais (kodas 280) teritorijos, Vilniaus m. sav., Vilniaus m., Dominikonų g. 11 detaliųjų ir žvalgomųjų archeologinių tyrimų, archeologinių žvalgymų 2019-2020 m. ataskaita. LII-f. 1, b. 10751.
19	Polocko g. 7A	16-17th c.	1501	1699	1600	Included	54.6812	25.302	42.8571	57.1429	0	0	0	100	1600-1699	Šležas A., 2022. Vilniaus senamiesčio (u.k. 16073) ir Vilniaus senojo miesto ir priemiesčių archeologinės vietovės (u.k. 25504) teritorijų, Polocko g. 7A 2021 m. detaliųjų archeologinių tyrimų ataskaita. LL-f. 1, b. 10346.
21	Sodų g. 6	16-17th c.	1501	1699	1600	Included	54.6734	25.284	100	0	0	0	0	100	1600-1699	Vasiliauskas L., 2022. Vilniaus senamiesčio (16073) teritorijos, Sodų g. 6, 2019-2020 m. detaliųjų archeologinių tyrimų ir žvalgymų ataskaita. LII-f.1, b. 10388.
31	Vilniaus g. 24	16-17th c.	1501	1699	1600	Included	54.6838	25.2798	57.1429	42.8571	0	0	0	100	1600-1699	Tetereva D., 2022. Vilniaus Jonušo Radvilos rūmų pastatų kompleksas (752), Vilniaus g. 24, Vilniaus m, 2020 m. detaliųjų archeologinių tyrimų ataskaita. LII-f. 1, b. 10821.
39	Vasario 16-osios g.	?; 16-17th c.	1501	1699	1600	Included	54.6891	25.2726	61.5385	23.0769	0	15.3846	0	100	1600-1699	Primary
42	Vanagėlio g. 11, 18	16-17th c.	1501	1699	1600	Included	54.6737	25.2947	0	100	0	0	0	100	1600-1699	Primary
23	Šv. Stepono g. 33, 35A	End of 16th c.-begining of 17th c.	1599	1601	1600	Included	54.6704	25.2786	0	33.3333	0	0	66.6667	100	1600-1699	Veževičienė V., 2022. Vilniaus miesto istorinės dalies, vad. Naujamiesčiu (33653) ir Vilniaus senojo miesto ir priemiesčių archeologinės vietovės (25504) teritorijos Šv. Stepono g. 33, 35A archeologinių žvalgymų ir detaliųjų tyrimų 2020-2021 m. ataskaita.
26	Upės g. 21	2nd half of 16th c.-17th c.	1550	1699	1624.5	Included	54.6956	25.2601	0	48.1081	0	51.8919	0	100	1600-1699	Motuzaitė Matuzevičiūtė Keen G., 2017. Vilniaus senamiesčio (16073) apsaugos teritorijoje, Upės g. 21 archeologinių detaliųjų tyrimų 2016 m.
8	J. Basanavičiaus g. 10	End of 16th c.-middle of 17th c.	1599	1650	1624.5	Included	54.6801	25.2748	96.1905	1.26984	0	2.53968	0	100	1600-1699	Masiulienė I., 2021. Vilniaus senamiesčio (16073) teritorijos, Vilniaus m. sav., Vilniaus m., J. Basanavičiaus g. 10, detaliųjų archeologinių tyrimų 2020 m. ataskaita. LIIB- f. 1, b. 9843.
23	Šv. Stepono g. 33, 35A	1st half of 17th c.	1601	1650	1625.5	Included	54.6704	25.2786	0	100	0	0	0	100	1600-1699	Veževičienė V., 2022. Vilniaus miesto istorinės dalies, vad. Naujamiesčiu (33653) ir Vilniaus senojo miesto ir priemiesčių archeologinės vietovės (25504) teritorijos Šv. Stepono g. 33, 35A archeologinių žvalgymų ir detaliųjų tyrimų 2020-2021 m. ataskaita.
1	A. Juozapavičiaus g. 23, Alytus	16?-18th c.	1501	1799	1650	Included	54.4033	24.0615	0	0	50	50	0	100	1600-1699	Gubinas V., 2021. Alytaus senojo miesto vietoje (33722), A. Juozapavičiaus g. 20, 23, 23A, 34A, Jiezno g. 3, Kalnų g. 8, Kreivoji g. 20, Merkinơs g. 10 ir Ramybės g. 21, Alytaus m., Alytaus m. sav., vykdytų detaliųkų archeologinių ir žvalgomųkų archeologinių tyrimų 2021 m. ataskaita. LIIB – f. 1, b. 10577.
45	Vydūno g. 1, 7, Jurbarkas	17th c.	1601	1699	1650	Included	55.0771	22.7604	0	100	0	0	0	100	1600-1699	Šimanauskas T., 2023. Jurbarko miesto istorinio centro (17085), Jurbarko rajono sav., Jurbarko miesto sen., Jurbarko m., Vydūno g. 1, 7, 2022 m. žvalgomųjų archeologinių tyrimų ir archeologinių žvalgymų ataskaita. LII- f. 1, b. 10731.
16	Klaipėdos g. 9	17th c.	1601	1699	1650	Included	54.6817	25.2796	12.5	87.5	0	0	0	100	1600-1699	Zaremba P., 2021. Vilniaus senamiesčio (16073), Vilniaus senojo miesto su priemiesčiais archeologinės vietovės (25504), Oskierkų rūmų pastatų komplekso (42854) teritorijos, Vilniaus m. sav., Vilniaus m., Klaipėdos g. 9 detaliųjų archeologinių tyrimų 2020–2021 metais ataskaita.
35	Pylimo g. 7	17th c.	1601	1699	1650	Included	54.6815	25.2748	53.8462	46.1538	0	0	0	100	1600-1699	Primary
40	Aguonų g. 17	17th c.	1601	1699	1650	Included	54.6747	25.2772	0	16.6667	0	66.6667	16.6667	100	1600-1699	Primary
41	Baltasis skr. 8	17th c.	1601	1699	1650	Included	54.6819	25.303	21.4286	78.5714	0	0	0	100	1600-1699	Valauskas M., 2023. Vilniaus senamiesčio (16073), Vilniaus senojo miesto ir priemiesčių archeologinės vietovės (25504) teritorijos, Vilniaus m. sav., Vilniaus m., Baltasis skg. 8 detaliųjų archeologinių tyrimų 2022 metais ataskaita. LII-f.1, b. 10960.
43	Aguonų g. 22	17th c.	1601	1699	1650	Included	54.6743	25.2779	0	0.250417	0	96.5776	3.17195	100	1600-1699	Primary
51	Bokšto g. 10	Middle of 17th c.	1650	1650	1650	Included	54.6797	25.2907	3.08686	78.9663	0	17.9469	0	100	1600-1699	Primary
29	Vilniaus g. 41	2nd half of 17th c.	1650	1699	1674.5	Included	54.6815	25.2807	90.8297	9.17031	0	0	0	100	1600-1699	Rutkovski S., 2023. Vilniaus senamiesčio (16073), Vilniaus senojo miesto ir priemiesčių archeologinės vietovės (25504), Mažųjų Radvilų rūmų (644) teritorijų, Vilniaus g. 41 2022 m. detaliųjų archeologinių tyrimų ataskaita.
44	Vilniaus g. 41A	?; End of 16th c.-18th c.	1599	1799	1699	Included	54.6809	25.2806	0	0	0	100	0	100	1600-1699	Primary
57	Naujojo Uosto g. 3, Klaipėda	16-19th c.	1501	1899	1700	Included	55.7089	21.1275	9.09091	90.9091	0	0	0	100	1700-1799	Lekniutė A., 2023. Klaipėdos senojo miesto vietos su priemiesčiais (27077), miesto istorinės dalies, vad. Naujamiesčiu (22012) teritorijų, Klaipėdos m. sav., Klaipėdos m., Naujoji Uosto g. 3, 2023 m. žvalgomųjų archeologinių tyrimų ataskaita. LII-f. 1, b. 11038.
32	Palangos g. 7 Kaunas	17-18th c.	1601	1799	1700	Included	54.8956	23.8944	0	100	0	0	0	100	1700-1799	Šležas A., 2021. Kauno senamiesčio (kodas 20171) teritorijos 2021 m. detaliųjų archeologinių tyrimų Kauno m., Palangos g. 7 ataskaita. LII-f. 1, b. 10050.
35	Prienų dvarvietė	17-18th c.	1601	1799	1700	Included	54.6292	23.9486	100	0	0	0	0	100	1700-1799	Primary
36	S. Dariaus ir S. Girėno g. 4, Birštonas	17-18th c.	1601	1799	1700	Included	54.6037	24.0323	0	38.4615	0	61.5385	0	100	1700-1799	Primary
37	Bazilijonų g. 3	(16)17-19th c.	1501	1899	1700	Included	54.674	25.2876	3.92157	94.1176	0	1.96078	0	100	1700-1799	Primary
1	Antakalnio g. 26B	17-18th c.	1601	1799	1700	Included	54.6991	25.3083	100	0	0	0	0	100	1700-1799	Mačiulis M., 2023. Vilniaus miesto istorinės dalies vad. Antakalniu (16084) teritorijos, Antakalnio g. 26B 2022 metų žvalgomųjų archeologinių tyrimų ataskaita.
33	Vingrių g.	17-18th c.	1601	1799	1700	Included	54.6787	25.2765	1.44928	4.34783	0	75.3623	18.8406	100	1700-1799	Mačiulis M., 2021. Vilniaus senojo miesto su priemiesčiais archeologinės vietovės (25504), Vilniaus senamiesčio (16073), Vingrių šaltinių vandenvietės vietos (30598), transformatorinės pastato (30600) teritorijų, Vingrių g. 9, 2021 metų detaliųjų archeologinių tyrimų ir žvalgymų ataskaita. LII- f. 1, b. 10420.
36	Algirdo g. 48C	17-18th c.	1601	1799	1700	Included	54.6687	25.2745	0	66.6667	0	33.3333	0	100	1700-1799	Primary
38	Vilniaus g. 33	17-18th c.	1601	1799	1700	Included	54.6835	25.2792	22.2222	77.7778	0	0	0	100	1700-1799	Mačiulis M., 2023. Vilniaus senojo miesto su priemiesčiais archeologinės vietovės (25504), Vilniaus senamiesčio (16073), Ryšių rūmų (15889) teritorijų Vilniaus g. 33, 2022 metų archeologinių žvalgomųjų ir detaliųjų tyrimų ataskaita. LII-f.1, b. 10986.
30	J. Jasinskio g. 14	2nd half of 17th c. - 1st half of 18th c.	1650	1750	1700	Included	54.6872	25.2629	0	0	0	100	0	100	1700-1799	Šatavičė E., 2021. Vilniaus miesto istorinės dalies, vad. Naujamiesčiu (33653) teritorijos, Vilniaus m. sav., Vilniaus m., Jasinskio g. 14 detaliųjų archeologinių tyrimų ir žvalgymų 2020 m. ataskaita. LII-f.1, b. 10152.
23	Šv. Stepono g. 33, 35A	End of 17th c.-begining of 18th c.	1699	1701	1700	Included	54.6704	25.2786	0	100	0	0	0	100	1700-1799	Veževičienė V., 2022. Vilniaus miesto istorinės dalies, vad. Naujamiesčiu (33653) ir Vilniaus senojo miesto ir priemiesčių archeologinės vietovės (25504) teritorijos Šv. Stepono g. 33, 35A archeologinių žvalgymų ir detaliųjų tyrimų 2020-2021 m. ataskaita.
27	Linginės kaimavietė	17th c.-begining of 19th c.	1601	1801	1701	Included	55.719	24.2185	0	100	0	0	0	100	1700-1799	Račas J., 2022. Linginės kaimavietės Panevėžio r. sav., Naujamiesčio sen., Lakštingalų k. 2021 m. detaliųjų archeologinių tyrimų ataskaita. LII-f. 1, b. 10394.
17	Liejyklos g. 8	17-18th c.; AMS 1640-?	1640	1799	1719.5	Included	54.6836	25.283	0	99.8623	0.137741	0	0	100	1700-1799	Žukovskis R., 2020. Vilniaus senojo miesto vietos su priemiesčiais (25504), Vilniaus m. sav., Vilniaus m., Liejyklos g. 8 detaliųjų archeloginių tyrimų 2018 m. ataskaita. LII-f. 1, b. 9768.
6	Arsenalo g. 1	2nd half of 17th-18th c.	1650	1799	1724.5	Included	54.6873	25.2892	2.38095	4.7619	0	88.0952	4.7619	100	1700-1799	Indrulėnaitė-Šimanauskienė V., 2022. Vilniaus senojo miesto ir priemiesčių archeologinės vietovės (25504), Vilniaus senamiesčio (16073), Arkikatedros bazilikos, Žemutinės ir Aukštutinės pilių pastatų, jų liekanų ir kitų statinių komplekso (642), Vilniaus piliavietės, vad. Gedimino kalnu, Pilies kalnu, Aukštutine ir Žemutine pilimi (141) teritorijų, Arsenalo g. 1 2022 m. detaliųjų archeologinių ty…
49	Rusų g. 5	2nd half of 17th c.-18th c.	1650	1799	1724.5	Included	54.6815	25.2915	0	16.1905	9.52381	59.0476	15.2381	100	1700-1799	Indrulėnaitė-Šimanauskienė V., Girlevičius L., Motuzaitė Matuzevičiūtė G., 2022. Rusų gatvės 5 Vilniuje gyventojų mityba ir paleoaplinka (XVI–XVIII amžiais) archeobotaninių tyrimų bei istorinių šaltinių duomenimis. Archaeologia Lituana, vol. 23, p. 218-236.
34	Pylimo g. 7	AMS 1697-1911; 17-18th c.	1697	1799	1748	Included	54.6815	25.2748	0	4.8951	9.09091	83.2168	2.7972	100	1700-1799	Primary
18	Plačioji g. 4	End of 17th c.-18th c.	1699	1799	1749	Included	54.6756	25.2817	88.8889	11.1111	0	0	0	100	1700-1799	Kvizikevičius L., 2021. Vilniaus senojo miesto vietos su priemiesčiais (u.k. 25504) ir Vilniaus senamiesčio (16073) teritorijos Plačioji g. 4 detaliųjų archeologijos tyrimų 2017-2018 m. ataskaita.
27	Užupio g. 15A	End of 17th c.-18th c.	1699	1799	1749	Included	54.6802	25.2969	0	0	0	0	100	100	1700-1799	Muralis V., 2023. Vilniaus miesto istorinės dalies, vadinamos Senamiesčiu (u. k. 16073), Vilniaus senojo miesto vietos su priemiesčiais (u. k. 25504) ir Vilniaus Šv. Baltramiejaus bažnyčios statinių komplekso (u. k. 28128) teritorijos, sklype kartu su Klebonijos pastatu (u. k. 28130) Užupio g. 15A Vilniuje, detaliųjų archeologinių tyrimų 2022 m. ataskaita.
41	Šv. Gertrūdos g., Kaunas	17-19th c.	1601	1899	1750	Included	54.8986	23.8933	0	0	0	23.0769	76.9231	100	1700-1799	Vingis V., 2021. Kauno senamiestyje (20171) Kauno m. sav., Kauno m., Jonavos g. 3, 20, M. Daukšos g. 44, Šv. Gertrūdos g. 14, 2021 m. archeologinių žvalgymų ataskaita. LII-f. 1, b. 10380.
41	Šv. Gertrūdos g., Kaunas	17-19th c.	1601	1899	1750	Included	54.8986	23.8933	0	0	0	100	0	100	1700-1799	Vingis V., 2021. Kauno senamiestyje (20171) Kauno m. sav., Kauno m., Jonavos g. 3, 20, M. Daukšos g. 44, Šv. Gertrūdos g. 14, 2021 m. archeologinių žvalgymų ataskaita. LII-f. 1, b. 10380.
49	Rusų g. 5	18th c.	1701	1799	1750	Included	54.6815	25.2915	0	0	0	0	100	100	1700-1799	Indrulėnaitė-Šimanauskienė V., Girlevičius L., Motuzaitė Matuzevičiūtė G., 2022. Rusų gatvės 5 Vilniuje gyventojų mityba ir paleoaplinka (XVI–XVIII amžiais) archeobotaninių tyrimų bei istorinių šaltinių duomenimis. Archaeologia Lituana, vol. 23, p. 218-236.
32	Dominikonų g. 11	18th.	1701	1799	1750	Included	54.6812	25.2855	0	0	0	100	0	100	1700-1799	Žvirblys A., 2023. Vilniaus senamiesčio (kodas 16073), Vilniaus senojo miesto ir priemiesčių archeologinės vietovės (kodas 25504), pastatų komplekso vad. Pociejų rūmais (kodas 280) teritorijos, Vilniaus m. sav., Vilniaus m., Dominikonų g. 11 detaliųjų ir žvalgomųjų archeologinių tyrimų, archeologinių žvalgymų 2019-2020 m. ataskaita. LII-f. 1, b. 10751.
32	Dominikonų g. 11	18th c.	1701	1799	1750	Included	54.6812	25.2855	0	100	0	0	0	100	1700-1799	Žvirblys A., 2023. Vilniaus senamiesčio (kodas 16073), Vilniaus senojo miesto ir priemiesčių archeologinės vietovės (kodas 25504), pastatų komplekso vad. Pociejų rūmais (kodas 280) teritorijos, Vilniaus m. sav., Vilniaus m., Dominikonų g. 11 detaliųjų ir žvalgomųjų archeologinių tyrimų, archeologinių žvalgymų 2019-2020 m. ataskaita. LII-f. 1, b. 10751.
20	Pranciškonų g. 4A	18th c.	1701	1799	1750	Included	54.6797	25.2816	0	0	0	0	100	100	1700-1799	Veževičienė V., 2016. Vilniaus senamiesčio (16073) teritorijos, Pranciškonų g. 4a 2015 m. detaliųjų archeologinių tyrimų ataskaita.
28	Vilniaus g. 41	18th c.	1701	1799	1750	Included	54.6815	25.2807	47.3083	52.6917	0	0	0	100	1700-1799	Kvizikevičius L., 2022. Vilniaus senamiesčio (16073), Vilniaus senojo miesto ir priemiesčių archeologinės vietovės (25504), Mažųjų Radvilų rūmų (644) teritorijų, Vilniaus g. 41 2021-2022 m. detaliųjų archeologinių tyrimų ir žvalgymų ataskaita.
54	Vydūno al. 33 B, Vilkija	2nd half of 18th c.-begining of 19th c.	1750	1801	1775.5	Included	55.0401	23.5749	50	50	0	0	0	100	1700-1799	Muralis V., 2023. Vilkijos (u.k. 17123) ir Vilkijos senojo miesto vietos (u.k. 23759) teritorijų, Vydūno al. 33, 33A, 33B, Vilkijos m., Kauno r. sav., 2022 metų detaliųjų archeologinių tyrimų, žvalgomųjų archeologinių tyrimų ir žvalgymų ataskaita. LII-f. 1, b. 10836.
2	Anykščių bažnyčia	End of 18th c.	1799	1799	1799	Included	55.5244	25.1003	0	100	0	0	0	100	1700-1799	Zabiela G., 2020. Anykščių Šv. Apaštalo Evangelisto Mato bažnyčios statinių komplekso (32801) teritorijos (Anykščiai, Vilniaus g. 8) 2020 m. detaliųjų archeologinių tyrimų ataskaita. LIIB - f. 1, b. 9932.
22	Sodų g. 23	18-20th c.	1701	1999	1850	Included	54.6713	25.2816	100	0	0	0	0	100	1700-1799	Mačiulis M., 2022. Vilniaus senojo miesto su priemiesčiais archeologinės vietovės (25504), Vilniaus senamiesčio (16073) teritorijų Sodų g. 23 2022 metų žvalgomųjų archeologinių tyrimų ataskaita. LII-f. 1, b.10452.
9	Bazilijonų g. 3	19th c.	1801	1899	1850	Included	54.674	25.2876	100	0	0	0	0	100	1700-1799	Bajarūnas T., 2022. Vilniaus senamiesčio (16073), Vilniaus senojo miesto su priemiesčiais archeologinės vietovės (25504), pastato (43845) teritorijų, Vilniaus m. sav., Vilniaus m., Bazilijonų g. 3 2021 m. detaliųjų archeologinių tyrimų ataskaita

## Sheet: TEMPORAL BINS 0-1799
Temporal Bins	Oat	Rye	Millet	Buckwheat	Hemp
101-200	8.33333	33.3333	58.3333	0	0
201-300	13.3333	40	46.6667	0	0
301-400	33.8889	49.0109	17.1002	0	0
401-500	0	75.5556	24.4444	0	0
501-600	0	33.3333	66.6667	0	0
601-700	2.71521	66.603	30.6818	0	0
701-800	4.54545	34.0909	61.3636	0	0
801-900	5	79.7436	15.2564	0	0
901-1000	8.33333	66.6667	25	0	0
1001-1100	0.0161603	74.9677	25.0162	0	0
1101-1200	5.62771	77.5832	16.7891	0	0
1201-1300	0	28.7456	69.2341	2.0202	0
1301-1400	1.65122	55.0444	30.1635	8.8254	4.31548
1401-1500	11.1905	79.9206	3.34957	5.55556	0
1501-1600	24.7222	43.2135	2.17865	27.805	2.08061
1601-1700	23.4531	43.3587	4.34783	23.4384	5.40201
1701-1800	21.5608	38.3377	0.646637	25.0218	14.4331

## Sheet: RADIOCARBON DATES
Context number	Site name	Dating	LAB_code	Reference
29	Mikniškių senovės gyvenvietė	345 cal BC – 114 cal AD	FTMC-FE88-10	Kvizikevičius L., 2022. Mikniškių senovės gyvenvietės teritorijos, Mikniškių k., Šeštokų sen., Lazdijų r. sav., 2021 m. detaliųjų archeologinių tyrimų ataskaita.
47	Vilūnų senovės gyvenvietė	39 cal BC – 61 cal AD	FTMC–AF29–16	Pranckėnaitė E., 2021. Vilūnų neįtvirtintos gyvenvietės, Kaišiadorių r., Kruonio sen. dujotiekių jungties tarp Lenkijos ir Lietuvos (GIPL) vietoje 2020 m. detaliųjų archeologinių tyrimų ataskaita. LII-f. 1, b. 10219.
77	Bakšių senovės gyvenvietė	80–233 cal AD	FTMC-QQ62-152	Minkevičius K., Vengalis R., Piličiauskienė G., Pranckėnaitė G., Račas J., Kisielienė D., 2024. Adaptability and resilience: Farming practices in Lithuania during the Roman Iron Age. Archaeologia Baltica, vol. 31, p. 44-62.
62	Antilgės piliakalnis	123–216 cal AD	FTMC-59-4	Poškienė J., 2018. Antilgės piliakalnio (u.k. 3572), Utenos r. sav., Daugailių sen., Antilgės k., 2017 m. detaliųjų archeologinių tyrimų ataskaita. LIIRS, f. 1, b. 8355.
29	Mikniškių senovės gyvenvietė	36 cal BC – 62 cal AD	FTMC-YS35-3	Kvizikevičius L., 2022. Mikniškių senovės gyvenvietės teritorijos, Mikniškių k., Šeštokų sen., Lazdijų r. sav., 2021 m. detaliųjų archeologinių tyrimų ataskaita.
48	Vilūnų senovės gyvenvietė	120-204 cal AD	FTMC–KV66–22	Šatavičė E., 2021. Vilūnų (Purvininkų) senovės gyvenvietės (Kaišiadorių r.) 2020 m. detaliųjų archeologinių tyrimų ataskaita. LII-f. 1, b. 10042.
39	Skudenių senovės gyvenvietė	128-204 cal AD	FTMC-DG81-3	Piličiauskas G., 2021. Skudenių senovės gyvenvietės, Kaišiadorių r. sav., dujotiekių jungties tarp Lenkijos ir Lietuvos (GIPL) vietoje detaliųjų archeologinių tyrimų 2020 m. ataskaita. LII-f. 1, b. 10439.
39	Skudenių senovės gyvenvietė	171-308; 125-239 cal AD	FTMC-UU26-7	Piličiauskas G., 2021. Skudenių senovės gyvenvietės, Kaišiadorių r. sav., dujotiekių jungties tarp Lenkijos ir Lietuvos (GIPL) vietoje detaliųjų archeologinių tyrimų 2020 m. ataskaita. LII-f. 1, b. 10439.
39	Skudenių senovės gyvenvietė	133-240 cal AD	FTMC-UU26-4	Piličiauskas G., 2021. Skudenių senovės gyvenvietės, Kaišiadorių r. sav., dujotiekių jungties tarp Lenkijos ir Lietuvos (GIPL) vietoje detaliųjų archeologinių tyrimų 2020 m. ataskaita. LII-f. 1, b. 10439.
39	Skudenių senovės gyvenvietė	133-240 cal AD	FTMC-UU26-5	Piličiauskas G., 2021. Skudenių senovės gyvenvietės, Kaišiadorių r. sav., dujotiekių jungties tarp Lenkijos ir Lietuvos (GIPL) vietoje detaliųjų archeologinių tyrimų 2020 m. ataskaita. LII-f. 1, b. 10439.
77	Bakšių senovės gyvenvietė	225-349 cal AD	FTMC-EP14-3	Minkevičius K., Vengalis R., Piličiauskienė G., Pranckėnaitė G., Račas J., Kisielienė D., 2024. Adaptability and resilience: Farming practices in Lithuania during the Roman Iron Age. Archaeologia Baltica, vol. 31, p. 44-62.
67	Lieporių 1 gyvenvietė	438±31 cal AD	-	Salatkienė B., Grigas T., 2017. Lieporių neįtvirtinta gyvenvietė I. In: Zabiela, G. (red.) Archeologiniai tyrinėjimai Lietuvoje 2016 metais. Vilnius: Lietuvos archeologijos draugija, pp. 78–89.
15	Gedimino kalnas	231-391 AD	FTMC-CK63-6-7	Kontrimas D., 2021. Vilniaus piliavietės, vad. Gedimino kalnu, Pilies kalnu, Aukštutine ir Žemutine pilimi (141), teritorijos, Vilniaus m. sav., Vilniaus m. detaliųjų archeologinių tyrimų 2020 m. ataskaita.
10	Dzūkų senovės gyvenvietė	132–237 AD	FTMC-FE88-23	Kvizikevičius L., 2022. Dzūkų senovės gyvenvietės teritorijos, Dzūkų k., Būdviečio sen., Lazdijų r. sav., 2021 m. detaliųjų archeologinių tyrimų ataskaita. LIIB-f. 1, b. 10481.
109	Kernavė (Aukuro kalnas)	415–534 cal AD	UBA-30595	Motuzaite Matuzevičiute G., Laužikas R. A Brief History of Brommcorn Millet Cultivation in Lithuania. Agronomy, vol. 13, 2023, 2171.
54	Gedimino kalnas	436-570 cal AD	UBA-33777	Motuzaite Matuzeviciute G., Rusteikyte A., Minkevicius K., Zekaite M., Tamulynas L. From Bronze Age Hillfort to Capital City New Radiocarbon Dates and the First Archaeobotanical Investigation at the Vilnius Castle Hill. Acta Archaeologica, vol. 91, 2020, p. 47–60.
56	Gedimino kalnas	710-880;688-890; 731-890; 647-774 cal AD	UBA-42390	Motuzaite Matuzeviciute G., Rusteikyte A., Minkevicius K., Zekaite M., Tamulynas L. From Bronze Age Hillfort to Capital City New Radiocarbon Dates and the First Archaeobotanical Investigation at the Vilnius Castle Hill. Acta Archaeologica, vol. 91, 2020, p. 47–60.
63	Apuolės piliakalnis	704-875 cal AD	FTMC-59-5	Grikpėdis M., 2021. Kultūrinių augalų kilmė Lietuvoje Rytų Baltijos regiono kontekste (archeobotanikos duomenimis iki XIV a.). Daktaro disertacija. Vilnius
73	Žardės gyvenvietė	884-977 cal AD	FTMC-BU90-1	Sprindys, S. (2019š) Bandužių, Žardės senovės gyvenvietės (u.k. 31842) teritorijos, Klaipėdos m. sav., Jūrininkių pr. 33 2018 m. detaliųjų archeologinių tyrimų ataskaita. LIIRS, f. 1, b. 8906.
79	Bilionių piliakalnis su gyvenviete	779-991 cal AD	FTMC-BZ00-1	Minkevičius K., 2019. Bilionių piliakalnio archeobotaninė medžiaga. In: Bilionių piliakalnis - nauji Žemaitijos istorijos faktai, eds. (G. Zabiela).
63	Apuolės piliakalnis	778-986 cal AD	FTMC-59-3	Grikpėdis M., 2021. Kultūrinių augalų kilmė Lietuvoje Rytų Baltijos regiono kontekste (archeobotanikos duomenimis iki XIV a.). Daktaro disertacija. Vilnius
73	Žardės gyvenvietė	889-1023 cal AD	FTMC-59-1	Ziabreva, V. (2019š) Bandužių, Žardės senovės gyvenvietės teritorijoje (u. k. 31842) žemės sklype unik. Nr. 2101-0033-0026, kadastrinis 169 adresas 21011/0032:26 Klaipėdos m. k. v. detaliųjų archeologinių tyrimų ataskaita. Klaipėda. Tyrėjo asmeninis archyvas.
40	Strumbagalvės senovės gyvenvietė	896–1031	FTMC-JY48-5	Kvizikevičius L., 2022. Strumbagalvės senovės gyvenvietės teritorijos, Lazdijų r. sav., Būdviečio sen., Strumbagalvės k., 2021 m. detaliųjų archeologinių tyrimų ataskaita. LII- f. 1, b. 10769.
72	Vaitkuškio piliakalnio papėdės gyvenvietė	1029-1151 cal AD	FTMC-59-6	Rutkovski S., Vutkin P., 2019. Vaitkuškio piliakalnio papėdės gyvenvietė. In: Zabiela, G. (red.) Archeologiniai tyrinėjimai Lietuvoje 2018 metais. Vilnius: Lietuvos archeologijos draugija, pp. 68–70.
107	Paverknių piliakalnis	1043-1163 cal AD	FTMC-56-2	Baltramiejūnaiė D., 2023. Apžiestos X-XIII a. keramikos tipologija ir chronologija (Lietuvos archeologijos paminklų tyrimų duomenimis). Daktaro disertacija. Vilnius
90	Ivangėnų piliakalnis su gyvenviete	1028-1184 cal AD	POZ–98377	Montvydas Ž., 2018. Gyvenvietė Ivangėnų piliakalnio aplinkoje. In: Archaeologiniai tyrinėjimai Lietuvoje 2017 metais, p. 73-78.
56	Gedimino kalnas	1161-1257 cal AD	FTMC-55-2	Motuzaite Matuzeviciute G., Rusteikyte A., Minkevicius K., Zekaite M., Tamulynas L. From Bronze Age Hillfort to Capital City New Radiocarbon Dates and the First Archaeobotanical Investigation at the Vilnius Castle Hill. Acta Archaeologica, vol. 91, 2020, p. 47–60.
54	Gedimino kalnas	1178–1261 cal AD	UBA–33776	Motuzaite Matuzeviciute G., Rusteikyte A., Minkevicius K., Zekaite M., Tamulynas L. From Bronze Age Hillfort to Capital City New Radiocarbon Dates and the First Archaeobotanical Investigation at the Vilnius Castle Hill. Acta Archaeologica, vol. 91, 2020, p. 47–60.
53	Gedimino kalnas	1227-1273 AD	UBA-33774	Motuzaite Matuzeviciute G., Rusteikyte A., Minkevicius K., Zekaite M., Tamulynas L. From Bronze Age Hillfort to Capital City New Radiocarbon Dates and the First Archaeobotanical Investigation at the Vilnius Castle Hill. Acta Archaeologica, vol. 91, 2020, p. 47–60.
61	Alytaus piliakalnio papėdė	1211-1277 cal AD	FTMC-41-4	Grikpėdis M., 2021. Kultūrinių augalų kilmė Lietuvoje Rytų Baltijos regiono kontekste (archeobotanikos duomenimis iki XIV a.). Daktaro disertacija. Vilnius
4	Arsenalo g. 5	1286-1387 AD	FTMC-DW62-1	Primary dating
47	Vilūnų senovės gyvenvietė	1265–1384 cal AD	-	Pranckėnaitė E., 2021. Vilūnų neįtvirtintos gyvenvietės, Kaišiadorių r., Kruonio sen. dujotiekių jungties tarp Lenkijos ir Lietuvos (GIPL) vietoje 2020 m. detaliųjų archeologinių tyrimų ataskaita. LII-f. 1, b. 10219.
100	Maišiagalos piliakalnis	1276-1391 cal AD	FTMC-DW62-2	Primary dating
94	Kernavės archeologinė vietovė (Mindaugo sostas)	1278-1393 cal AD	POZ-87360	Minkevičius K., Vengalis R., Piličiauskienė G., Poškienė J., Pilkauskas M., Vėlius G., 2024. Agricultural development in the southeastern Baltic region from the late Bronze Age to the medieval period: a case study of Kernavė, southeast Lithuania. Vegetation History and Archaeobotany, 1-14.
3	Arsenalo g. 5	1282-1383 cal AD	FTMC-TX65-1	Baltramiejūnienė D., 2022. Vilniaus senamiesčio (16073), Vilniaus senojo miesto ir priemiesčių archeologinės vietovės (25504), Vilniaus piliakalnio su papiliais ir gyvenviete (664) teritorijos, Vilniaus piliakalnio su papiliais ir gyvenviete piliakalnio, vad. Kreivuoju kalnu, Plikuoju kalnu, Trijų kryžių kalnu (30357), Vilniaus m. sav., Vilniaus m., Arsenalo g. 5 2022 m. archeologinių žvalgomųjų …
55	Gedimino kalnas	1277-1384 cal AD	FTMC-55-1	Motuzaite Matuzeviciute G., Rusteikyte A., Minkevicius K., Zekaite M., Tamulynas L. From Bronze Age Hillfort to Capital City New Radiocarbon Dates and the First Archaeobotanical Investigation at the Vilnius Castle Hill. Acta Archaeologica, vol. 91, 2020, p. 47–60.
55	Gedimino kalnas	1277-1384 cal AD	FTMC-55-2	Motuzaite Matuzeviciute G., Rusteikyte A., Minkevicius K., Zekaite M., Tamulynas L. From Bronze Age Hillfort to Capital City New Radiocarbon Dates and the First Archaeobotanical Investigation at the Vilnius Castle Hill. Acta Archaeologica, vol. 91, 2020, p. 47–60.
55	Gedimino kalnas	1277-1384 cal AD	FTMC-55-3	Motuzaite Matuzeviciute G., Rusteikyte A., Minkevicius K., Zekaite M., Tamulynas L. From Bronze Age Hillfort to Capital City New Radiocarbon Dates and the First Archaeobotanical Investigation at the Vilnius Castle Hill. Acta Archaeologica, vol. 91, 2020, p. 47–60.
3	Arsenalo g. 5	1280-1320 cal AD	FTMC-TX65-2	Baltramiejūnienė D., 2022. Vilniaus senamiesčio (16073), Vilniaus senojo miesto ir priemiesčių archeologinės vietovės (25504), Vilniaus piliakalnio su papiliais ir gyvenviete (664) teritorijos, Vilniaus piliakalnio su papiliais ir gyvenviete piliakalnio, vad. Kreivuoju kalnu, Plikuoju kalnu, Trijų kryžių kalnu (30357), Vilniaus m. sav., Vilniaus m., Arsenalo g. 5 2022 m. archeologinių žvalgomųjų …
110	Pamerkiai	1302–1396 AD	FTMC-VR52-1	Gudaitienė G., Motuza G., Stančikaitė M., Pukienė R., Kisielienė D., Mažeika J., Čelkis T., Baltramiejūnaitė D., Šapolaitė J., Ežerinskis Ž., 2022. New insights into the medieval history of a non-urban territory: multidisciplinary investigations in SE Lithuania. Baltica, vol. 35(2), p. 91-113.
52	Bokšto g. 6	1410-1450	FTMC-23-1	Motuzaitė Matuzevičiūtė G., Jonaitis R., Kaplūnaitė I., 2017. Ūkinio pastato, stovėjusioCivitas Rutenica kvartale, archeobotaniniai tyrimai: kitataučių kasdienybė Vilniaus miesto aplinkoje XIV a. pabaigoje - XV a. I pusėje. In Lituanistica vol. 63, issue 4(110), p. 219-233.
26	Upės g. 21	1522-1653 calAD	UBA-30602	Motuzaitė Matuzevičiūtė Keen G., 2017. Vilniaus senamiesčio (16073) apsaugos teritorijoje, Upės g. 21 archeologinių detaliųjų tyrimų 2016 m.
43	Aguonų g. 22	1516-1639 cal AD	FTMC-LG96-16	Rutkovski S., 2023. Vilniaus senojo miesto ir priemiesčių archeologinės vietovės (kodas 25504) ir Vilniaus senamiesčio (kodas 16073) teritorijų, Vilniaus m. sav., Vilniaus m., Aguonų g. 22, 2022 m. detaliųjų archeologinių tyrimų ir archeologinių žvalgymų ataskaita. Archaeological excavation report.
53	Senkapis (u.k. 4291)	1525-1671 cal AD	FTMC-JT77-1	Petrulis D., 2023. Staurylų k. senkapio (u.k. 4291), Telšių rajono sav., Tryškių sen., žvalgomųjų archeologinių ir archeologinių žvalgymų 2022 m. ataskaita. LII- f. 1, b. 10854.
53	Senkapis (u.k. 4291)	1525-1671 cal AD	FTMC-JT77-2	Petrulis D., 2023. Staurylų k. senkapio (u.k. 4291), Telšių rajono sav., Tryškių sen., žvalgomųjų archeologinių ir archeologinių žvalgymų 2022 m. ataskaita. LII- f. 1, b. 10854.
34	Pylimo g. 7	AMS 1710-1906; 17-18th c.	FTMC-JY48-2	Motuzaite Matuzevičiute G., Laužikas R. A Brief History of Brommcorn Millet Cultivation in Lithuania. Agronomy, vol. 13, 2023, 2171.
