# Supplementary material for: The shifting of buffer crop repertoires in pre-industrial north-eastern Europe
Source: Sci Rep. 2025 Jan 29;15:3720. doi: 10.1038/s41598-025-87792-0 (PMC11779896; doi:10.1038/s41598-025-87792-0)
Supplement: Supplementary file 2 — Supplementary Material 2 [file 41598_2025_87792_MOESM2_ESM.xlsx]

## Sheet: OVERVIEW PALEOCLIMATE DATA
Site name	Latitude	Longtitude	Climatic period	Earliest date	Latest date	SD	Name	Other	Temperature	Precipitation	Country	Subdivision	Season	Parameter	Archive	References
Bunker Cave	51.2203	7.3953	Roman Climatic Optimum	-350	350		Speleothems		Warm	Humid	Germany	Western Germany	Winter	Temperature	Speleothems	Waltgenbach 2021
Lake Spore	52.4494	21.2833		-330			Chironomids		Cold		Poland	North Poland	Annual	Temperature	Lake	Pleskot 2021
Cepkeliai Ryeznicia	54	24.3	Roman Climatic Optimum	100	650		Pollen,TRW,LOI,Macrofossils		Warm	Dry	Lithuania	North eastern Lithuania	Centenial	Mix	Wetland	Edvardson 2016
Central Europe	49.2254	16.5938		150	250		TRSI		Hot	Humid	Czech Republic,North Eastern Austria	North Slovakia	Summer	Temperature	Terrestrial	Torbenson 2023
Central Europe	49.2254	16.5938		184	241		TRSI		Warm	Humid	Czech Republic,North Eastern Austria	North Slovakia	Summer	Temperature	Terrestrial	Torbenson 2023
Mannikajarve bog	58.52	26.15	Roman Climatic Optimum	200	340		Macrofossils,Testate amoebae		Hot	Humid	Estonia	East central Estonia	Summer	Precipitation	Peat bog	Sillasoo 2007
Central Europe	49.2254	16.5938		236			TRSI		Hot	Humid	Czech Republic,North Eastern Austria	North Slovakia	Summer	Temperature	Terrestrial	Torbenson 2023
Bunker Cave	51.2203	7.3953	Dark Ages Cold Period	350	700		Speleothems		Cold	Dry	Germany	Western Germany	Winter	Temperature	Speleothems	Waltgenbach 2021
Central Europe	49.2254	16.5938		350	420		TRSI	Low growing	Hot		Czech Republic,North Eastern Austria	North Slovakia	Summer	Temperature	Terrestrial	Torbenson 2023
Central Europe	49.2254	16.5938		365	422		TRSI		Cold	Dry	Czech Republic,North Eastern Austria	North Slovakia	Summer	Temperature	Terrestrial	Torbenson 2023
Central Europe	49.2254	16.5938		387			TRSI		Cold		Czech Republic,North Eastern Austria	North Slovakia	Summer	Temperature	Terrestrial	Torbenson 2023
Mannikajarve bog	58.52	26.15	Migration Period	440			Macrofossils,Testate amoebae		Hot	Humid	Estonia	East central Estonia	Summer	Precipitation	Peat bog	Sillasoo 2007
Tuchola kettle hole mire	53.343	17.5405	Migration Period	500		25	Pollen,Testate amoebae,Macrofossils		Hot	Dry	Poland	North Poland	Summer	Temperature	Peat bog	Lamentowicz 2008
Komarow	50.383	23.3002	Dark Ages Cold Period	500	1050		Macrofossils,molluscs,geochemistry,pollen, stable isotopes of oxygen and carbon		Cold	Dry	Poland	South eastern Poland	Summer	Mix	Peat bog	Dobrowolski 2016
Tatra Mountains	49.3191	19.8767	Medieval Climatic Anomaly	501	1399		TRW		Warm	Dry	Poland	South Poland	Summer	Temperature	Terrestrial	Gasiorowski Sienkiwicz 2010b
Central Europe	49.2254	16.5938		513			TRSI		Warm		Czech Republic,North Eastern Austria	North Slovakia	Summer	Temperature	Terrestrial	Torbenson 2023
Fennoscandia	59.5	20		536			TRW		Cold		Finland	South Finland	Season	Temperature	Terrestrial	Briffa 1990
Mannikajarve bog	58.52	26.15	Migration Period	540			Macrofossils,Testate amoebae		Cold	Humid	Estonia	East central Estonia	Summer	Precipitation	Peat bog	Sillasoo 2007
Kusowo bog	53.74	15.697	Migration Period	550			DWT		Cold	Humid	Poland	North Poland	Annual	Precipitation	Peat bog	Lamentowicz 2015
Central Europe	49.2254	16.5938		650	750		TRSI	Low growing	Cold		Czech Republic,North Eastern Austria	North Slovakia	Summer	Temperature	Terrestrial	Torbenson 2023
Jura Alps	46.7	5.8		650	850		TRW	High water level	Cold	Humid	France	Eastern France	Summer	Precipitation	Lake	Magny 2004
Cepkeliai Ryeznicia	54	24.3	Medieval Climatic Anomaly	650	850		Pollen,TRW,LOI,Macrofossils		Warm	Dry	Lithuania	Lithuania	Centenial	Mix	Wetland	Edvardson 2016
Central Europe	49.2254	16.5938		670	727		TRSI		Cold	Dry	Czech Republic,North Eastern Austria	North Slovakia	Summer	Temperature	Terrestrial	Torbenson 2023
Central Europe	49.2254	16.5938		678			TRSI		Cold		Czech Republic,North Eastern Austria	North Slovakia	Summer	Temperature	Terrestrial	Torbenson 2023
Central Europe	49.2254	16.5938		696			TRSI		Cold		Czech Republic,North Eastern Austria	North Slovakia	Summer	Temperature	Terrestrial	Torbenson 2023
Central Europe	49.2254	16.5938		704			TRSI		Cold		Czech Republic,North Eastern Austria	North Slovakia	Summer	Temperature	Terrestrial	Torbenson 2023
Central Europe	49.2254	16.5938		707			TRSI		Cold		Czech Republic,North Eastern Austria	North Slovakia	Summer	Temperature	Terrestrial	Torbenson 2023
Central Europe	49.2254	16.5938		718			TRSI		Cold		Czech Republic,North Eastern Austria	North Slovakia	Summer	Temperature	Terrestrial	Torbenson 2023
Central Europe	49.2254	16.5938		721			TRSI		Cold		Czech Republic,North Eastern Austria	North Slovakia	Summer	Temperature	Terrestrial	Torbenson 2023
Central Europe	49.2254	16.5938		723	1850		TRSI		Cold		Czech Republic,North Eastern Austria	North Slovakia	Summer	Temperature	Terrestrial	Torbenson 2023
Central Europe	49.2254	16.5938	Little Ice Age first	724	1550		TRSI		Cold	Dry	Czech Republic,North Eastern Austria	High Tatra Mountains	Summer	Temperature	Terrestrial	Torbenson 2023
Central Europe	49.2254	16.5938	Little Ice Age second	728	1900		TRSI		Cold	Humid	Czech Republic,North Eastern Austria	High Tatra Mountains	Summer	Temperature	Terrestrial	Torbenson 2023
Fennoscandia	59.5	20	Little Ice Age first	749	768		TRW		Warm	Dry	Finland	South Finland	Season	Temperature	Terrestrial	Briffa 1990
Fennoscandia	59.5	20	Little Ice Age second	795	814		TRW		Cold	Humid	Finland	South Finland	Season	Temperature	Terrestrial	Briffa 1990
Fennoscandia	59.5	20	Medieval Climatic Anomaly	800	1399		TRW		Cold	Dry	Finland	South Finland	Season	Temperature	Terrestrial	Briffa 1990
Fennoscandia	59.5	20	Little Ice Age	848	867		TRW		Cold		Finland	South Finland	Season	Temperature	Terrestrial	Briffa 1990
Mannikajarve bog	58.52	26.15	Medieval Climatic Anomaly	850			Macrofossils,Testate amoebae	Cold summer	Cold	Humid	Estonia	East central Estonia	Summer	Precipitation	Peat bog	Sillasoo 2007
Bunker Cave	51.2203	7.3953	Medieval Climatic Anomaly	850	1350		Speleothems	Cold summer	Warm	Humid	Germany	Western Germany	Winter	Temperature	Speleothems	Waltgenbach 2021
Cepkeliai Ryeznicia	54	24.3	Medieval Climatic Anomaly	850	1050		Pollen,TRW,LOI,Macrofossils	Cold summer	Warm	Dry	Lithuania	Lithuania	Centenial	Mix	Wetland	Edvardson 2016
Central Europe	49.2254	16.5938	Little Ice Age	899			TRSI	Extremely humid		Humid	Czech Republic,North Eastern Austria	Southern Poland	Summer	Temperature	Terrestrial	Torbenson 2023
Central Europe	49.2254	16.5938	Little Ice Age	920	1050		TRSI	Extremely humid		Dry	Czech Republic,North Eastern Austria	Southern Poland	Summer	Temperature	Terrestrial	Torbenson 2023
Fennoscandia	59.5	20	Little Ice Age	961			TRW	Extremely humid	Cold	Humid	Finland	South Finland	Season	Temperature	Terrestrial	Briffa 1990
Vilnius Lower Castle	55.5052	25.421	Medieval Climatic Anomaly	1000			TRW	Low water level		Humid	Poland	Lithuania	Summer	Mix	Peat bog	Stancikaite 2019
Komarow	50.383	23.3002	Medieval Climatic Anomaly	1040	1275		Macrofossils,molluscs,geochemistry,pollen, stable isotopes of oxygen and carbon	Very warm summer	Warm	Humid	Poland	South eastern Poland	Summer	Mix	Peat bog	Dobrowolski 2016
Central Europe	49.2254	16.5938	Maunder Minimum first	1060	1074		TRSI	Very cold summer,rockfall catastrophe	Cold	Humid	Czech Republic,North Eastern Austria	Southern Poland	Summer	Temperature	Terrestrial	Torbenson 2023
Central Europe	49.2254	16.5938	Maunder Minimum first	1063			TRSI	Cold summer	Cold	Humid	Czech Republic,North Eastern Austria	Southern Poland	Summer	Temperature	Terrestrial	Torbenson 2023
Fennoscandia	59.5	20	Late Maunder Minimum	1087	1106		TRW	Cold summer	Warm		Finland	South Finland	Season	Temperature	Terrestrial	Briffa 1990
Tatra Mountains	49.3191	19.8767	Late Maunder Minimum	1091			TRW	Warm summer	Cold		Slovakia	North Slovakia	Summer	Temperature	Terrestrial	Buntgen 2013
Lake Spore	52.4494	21.2833	Little Ice Age	1100	1688		Chironomids	Cooling	Cold		Poland	North Poland	Annual	Temperature	Lake	Pleskot 2021
Fennoscandia	59.5	20	Late Maunder Minimum cool phase	1108	1157		TRW	Extremely cold	Cold		Finland	South Finland	Season	Temperature	Terrestrial	Briffa 1990
Fennoscandia	59.5	20	Late Maunder Minimum warm phase	1109			TRW	Very warm summer	Cold		Finland	South Finland	Season	Temperature	Terrestrial	Briffa 1990
Tatra Mountains	49.3191	19.8767	Late Maunder Minimum cool phase	1122			TRW	Cold summer,volcano	Hot		Slovakia	North Slovakia	Summer	Temperature	Terrestrial	Buntgen 2013
Fennoscandia	59.5	20	Late Maunder Minimum last phase	1127	1146		TRW	Extremely cold	Cold		Finland	South Finland	Season	Temperature	Terrestrial	Briffa 1990
Fennoscandia	59.5	20	Late Maunder Minimum last phase	1139			TRW	Warm summer	Cold		Finland	South Finland	Season	Temperature	Terrestrial	Briffa 1990
Kusowo bog	53.74	15.697	Medieval Climatic Anomaly	1150			DWT	Cold summer	Cold	Humid	Poland	North Poland	Annual	Precipitation	Peat bog	Lamentowicz 2015
Cepkeliai Ryeznicia	54	24.3	Little Ice Age	1150	1789		Pollen,TRW,LOI,Macrofossils	Low water level	Cold	Dry	Lithuania	Lithuania	Centenial	Mix	Wetland	Edvardson 2016
Fennoscandia	59.5	20	Late Maunder Minimum last phase	1158	1177		TRW	Extremely warm	Warm		Finland	South Finland	Season	Temperature	Terrestrial	Briffa 1990
Fennoscandia	59.5	20		1161			TRW	Cold summer	Warm		Finland	South Finland	Season	Temperature	Terrestrial	Briffa 1990
Jura Alps	46.7	5.8	Late Maunder Minimum last phase	1200	1300		TRW	High water level	Warm	Humid	France	Eastern France	Summer	Precipitation	Lake	Magny 2004
Tatra Mountains	49.3191	19.8767	Late Maunder Minimum last phase	1248	1745		TRW	Cold summer	Cold		Slovakia	North Slovakia	Summer	Temperature	Terrestrial	Buntgen 2013
Tatra Mountains	49.3191	19.8767	Late Maunder Minimum last phase	1250	1850		TRW	Cold summer	Cold		Slovakia	North Slovakia	Summer	Temperature	Terrestrial	Buntgen 2013
Impiltis	56.0723	21.1447	Little Ice Age	1260			Pollen,Diatoms,Phytoliths,Geochemical	Cold summer	Cold		Lithuania	North western Lithuania	Summer	Temperature	Terrestrial	Stancikaite 2009
Tatra Mountains	49.3191	19.8767	Dalton Minimum	1265	1820		TRW	Cold summer	Cold		Slovakia	North Slovakia	Summer	Temperature	Terrestrial	Buntgen 2013
Komarow	50.383	23.3002	Medieval Climatic Anomaly	1275	1360		Macrofossils,molluscs,geochemistry,pollen, stable isotopes of oxygen and carbon	Cold summer	Warm	Dry	Poland	South eastern Poland	Summer	Mix	Peat bog	Dobrowolski 2016
Central Europe	49.2254	16.5938	Dalton Minimum	1304			TRSI	Cold summer	Warm		Czech Republic,North Eastern Austria	Southern Poland	Summer	Temperature	Terrestrial	Torbenson 2023
Fennoscandia	59.5	20	Little Ice Age	1344	1363		TRW		Cold	Humid	Finland	South Finland	Season	Temperature	Terrestrial	Briffa 1990
Tatra Mountains	49.3191	19.8767	Little Ice Age first	1350	1550		TRW		Cold	Dry	Slovakia, Poland	High Tatra Mountains	Summer	Temperature	Terrestrial	Kotarba 2006
Tatra Mountains	49.3191	19.8767	Little Ice Age first	1350	1550		TRW		Cold	Dry	Poland	South Poland	Summer	Temperature	Terrestrial	Gasiorowski Sienkiwicz 2010a
Bunker Cave	51.2203	7.3953	Little Ice Age	1350	1850		Speleothems		Cold	Dry	Germany	Western Germany	Winter	Temperature	Speleothems	Waltgenbach 2021
Vilnius Lower Castle	54.4101	25.1703	Little Ice Age	1350			Chironomids	Environmnetal change	Cold		Poland	North Poland	Summer	Mix	Peat bog	Stancikaite 2008
Petresiunai	55.5052	25.421	Little Ice Age	1350			Pollen,Diatoms,Phytoliths,Geochemical	Coldest	Cold		Lithuania	Southeastern Lithuania	Season	Temperature	Terrestrial	Stancikaite 2019
Tatra Mountains	49.3191	19.8767		1361			TRW		Cold		Slovakia	North Slovakia	Summer	Temperature	Terrestrial	Buntgen 2013
Central Europe	49.2254	16.5938	Little Ice Age	1361			TRSI			Dry	Czech Republic,North Eastern Austria	North western Lithuania	Summer	Temperature	Terrestrial	Torbenson 2023
Central Europe	49.2254	16.5938	Little Ice Age	1384			TRSI			Dry	Czech Republic,North Eastern Austria	Southern Poland	Summer	Temperature	Terrestrial	Cook 2015
Czarny Staw Gasienicowy Lake	49.2423	19.9854	Little Ice Age	1400			Geomorphic events				Poland	Southern Poland	Centenial	Annual	Lake	Kotarba 2006
Panszczyca valley	49.2423	19.9854	Little Ice Age	1400			Geomorphic events				Poland	Southern Poland	Centenial	Annual	Lake	Kotarba 2006
Morskie Oko Lake	49.2082	20.0617	Little Ice Age	1400			Geomorphic events				Poland	Southern Poland	Centenial	Annual	Lake	Kotarba 2006
Czarny Staw pod Rysami Lake	49.1794	20.0651	Little Ice Age	1400			Geomorphic events				Poland	Southern Poland	Centenial	Annual	Lake	Kotarba 2006
Zielony Staw Kiezmarski ake	49.2002	20.1427	Little Ice Age	1400		25	Geomorphic events			Dry	Slovakia	Northern Slovakia	Centenial	Annual	Lake	Kotarba 2006
Tatra Mountains	49.3191	19.8767	Little Ice Age	1406		25	TRW	High water level	Hot		Slovakia	North Slovakia	Summer	Temperature	Terrestrial	Buntgen 2013
Mannikajarve bog	58.52	26.15	Little Ice Age	1410	340		Macrofossils,Testate amoebae			Humid	Estonia	East central Estonia	Summer	Precipitation	Peat bog	Sillasoo 2007
Lake Zabinskie	53.5863	22.6785	Sporer Minimum	1430	1460		Chrysophytes		Cold	Humid	Poland	North Poland	Winter	Temperature	Lake	Hernandez Almeida 2015
Lake Zabinskie	53.5863	22.6785	Little Ice Age	1430	1460		Chrysophytes		Cold	Humid	Estonia	East central Estonia	Winter	Temperature	Lake	Hernandez Almeida 2015
North central Europe	59.5	20	Medieval Climatic Anomaly	1437	1473		TRW	Megadrought	Drought	Humid	Finland	South Finland	Season	Temperature	Terrestrial	Briffa 1990
Central Europe	49.2254	16.5938	Little Ice Age	1449			TRSI		Warm	Humid	Czech Republic,North Eastern Austria	East central Estonia	Summer	Temperature	Terrestrial	Torbenson 2023
Tuchola kettle hole mire	53.343	17.5405	Little Ice Age	1450		25	Pollen,Testate amoebae,Macrofossils	High water level		Humid	Poland	North Poland	Summer	Temperature	Peat bog	Lamentowicz 2008
Central Europe	49.2254	16.5938	Little Ice Age	1472	1529		TRSI		Warm	Dry	Czech Republic,North Eastern Austria	Western Germany	Summer	Temperature	Terrestrial	Torbenson 2023
Poland	50.0647	19.945	Dark Ages Cold Period	1473	700		PDSI	Megadrought	Cold	Dry	Poland	Western Germany	Summer	Precipitation	Terrestrial	Cook 2015
Central Europe	49.2254	16.5938	Medieval Climatic Anomaly	1492	1350		TRSI		Warm	Humid	Czech Republic,North Eastern Austria	Western Germany	Summer	Temperature	Terrestrial	Torbenson 2023
Komarow	50.383	23.3002	Little Ice Age	1500	1750		Macrofossils,molluscs,geochemistry,pollen, stable isotopes of oxygen and carbon		Cold	Dry	Poland	South eastern Poland	Summer	Mix	Peat bog	Dobrowolski 2016
Tatra Mountains	49.3191	19.8767		1507	1050		TRW		Cold	Dry	Slovakia	North Slovakia	Summer	Temperature	Terrestrial	Buntgen 2013
Central Europe	49.2254	16.5938		1508	1509		TRSI			Dry	Czech Republic,North Eastern Austria		Summer	Temperature	Terrestrial	Torbenson 2023
Central Europe	49.2254	16.5938		1521	241		TRSI		Warm	Humid	Czech Republic,North Eastern Austria		Summer	Temperature	Terrestrial	Torbenson 2023
Central Europe	49.2254	16.5938		1530	422		TRSI		Warm	Dry	Czech Republic,North Eastern Austria		Summer	Temperature	Terrestrial	Torbenson 2023
Poland	50.0647	19.945		1540	727		PDSI	Megadrought	Cold	Dry	Poland		Summer	Precipitation	Terrestrial	Cook 2015
Central Europe	49.2254	16.5938		1547	420		TRSI	Low growing	Warm		Czech Republic,North Eastern Austria		Summer	Temperature	Terrestrial	Torbenson 2023
Tatra Mountains	49.3191	19.8767	Little Ice Age second	1550	1900		TRW	Low growing	Cold	Humid	Slovakia, Poland	High Tatra Mountains	Summer	Temperature	Terrestrial	Kotarba 2006
Tatra Mountains	49.3191	19.8767	Little Ice Age second	1550	1900		TRW		Cold	Humid	Poland	South Poland	Summer	Temperature	Terrestrial	Gasiorowski Sienkiwicz 2010a
Tatra Mountains northern slope	49.4198	20.1671	Little Ice Age	1550	1575		TRW		Warm	Dry	Poland	Southern Poland	Summer	Temperature	Terrestrial	Niedzwiedz 2010
Kusowo bog	53.74	15.697	Little Ice Age	1550			DWT			Humid	Poland	North Poland	Annual	Precipitation	Peat bog	Lamentowicz 2015
Fennoscandia	59.5	20		1550			TRW		Warm	Humid	Finland	South Finland	Season	Temperature	Terrestrial	Briffa 1990
Fennoscandia	59.5	20		1551	1570		TRW		Warm	Humid	Finland	South Finland	Season	Temperature	Terrestrial	Briffa 1990
Tatra Mountains	49.3191	19.8767		1575			TRW		Hot		Slovakia	North Slovakia	Summer	Temperature	Terrestrial	Buntgen 2013
Central Europe	49.2254	16.5938		1582	1639		TRSI		Cold		Czech Republic,North Eastern Austria		Summer	Temperature	Terrestrial	Torbenson 2023
Tatra Mountains	49.3191	19.8767		1589			TRW		Hot		Slovakia	North Slovakia	Summer	Temperature	Terrestrial	Buntgen 2013
Lake Spore	52.4494	21.2833	Little Ice Age	1590			Chironomids	Coldest	Cold		Poland	North Poland	Annual	Temperature	Lake	Pleskot 2021
Poland	50.0647	19.945		1590			PDSI	Megadrought	Warm	Dry	Poland		Summer	Precipitation	Terrestrial	Cook 2015
Tatra Mountains northern slope	49.4198	20.1671	Little Ice Age	1592			TRW	Cold summer	Cold	Humid	Poland	Southern Poland	Summer	Temperature	Terrestrial	Niedzwiedz 2010
Tatra Mountains	49.3191	19.8767		1594			TRW		Hot		Slovakia	North Slovakia	Summer	Temperature	Terrestrial	Buntgen 2013
Tatra Mountains	49.3191	19.8767		1595			TRW		Hot		Slovakia	North Slovakia	Summer	Temperature	Terrestrial	Buntgen 2013
Tatra Mountains	49.3191	19.8767		1596			TRW		Hot		Slovakia	North Slovakia	Summer	Temperature	Terrestrial	Buntgen 2013
Tatra Mountains	49.3191	19.8767		1597			TRW		Hot		Slovakia	North Slovakia	Summer	Temperature	Terrestrial	Buntgen 2013
Fennoscandia	59.5	20		1600	1650		TRW		Cold		Finland	South Finland	Season	Temperature	Terrestrial	Briffa 1990
Fennoscandia	59.5	20		1601	1620		TRW		Cold		Finland	South Finland	Season	Temperature	Terrestrial	Briffa 1990
Tatra Mountains northern slope	49.4198	20.1671	Little Ice Age	1605			TRW	Extremely humid	Cold	Humid	Poland	Southern Poland	Summer	Temperature	Terrestrial	Niedzwiedz 2010
Tatra Mountains northern slope	49.4198	20.1671	Little Ice Age	1617			TRW	Extremely humid	Cold	Humid	Poland	Southern Poland	Summer	Temperature	Terrestrial	Niedzwiedz 2010
Tatra Mountains northern slope	49.4198	20.1671	Little Ice Age	1618			TRW	Extremely humid	Cold	Humid	Poland	Southern Poland	Summer	Temperature	Terrestrial	Niedzwiedz 2010
Tatra Mountains northern slope	49.4198	20.1671	Little Ice Age	1621			TRW	Extremely humid	Cold	Humid	Poland	Southern Poland	Summer	Temperature	Terrestrial	Niedzwiedz 2010
Tatra Mountains northern slope	49.4198	20.1671	Little Ice Age	1625			TRW	Cold summer	Cold	Humid	Poland	Southern Poland	Summer	Temperature	Terrestrial	Niedzwiedz 2010
Tatra Mountains	49.3191	19.8767		1637			TRW		Cold		Slovakia	North Slovakia	Summer	Temperature	Terrestrial	Buntgen 2013
Tatra Mountains	49.3191	19.8767		1638			TRW		Cold		Slovakia	North Slovakia	Summer	Temperature	Terrestrial	Buntgen 2013
Tatra Mountains northern slope	49.4198	20.1671	Little Ice Age	1639			TRW	Cold summer	Cold	Humid	Poland	Southern Poland	Summer	Temperature	Terrestrial	Niedzwiedz 2010
Mannikajarve bog	58.52	26.15	Little Ice Age	1640	1074		Macrofossils,Testate amoebae			Humid	Estonia	East central Estonia	Summer	Precipitation	Peat bog	Sillasoo 2007
Kusowo bog	53.74	15.697	Little Ice Age	1650	1529		DWT		Warm	Humid	Poland	North Poland	Annual	Precipitation	Peat bog	Lamentowicz 2015
Fennoscandia	59.5	20		1650	1639		TRW		Warm		Finland	South Finland	Season	Temperature	Terrestrial	Briffa 1990
Lake Zabinskie	53.5863	22.6785	Maunder Minimum	1658	1707		Chrysophytes	High water level	Cold	Humid	Poland	North Poland	Winter	Temperature	Lake	Hernandez Almeida 2015
Tatra Mountains northern slope	49.4198	20.1671	Maunder Minimum first	1661	850		TRW	Very warm summer	Warm	Humid	Poland	Southern Poland	Summer	Temperature	Terrestrial	Niedzwiedz 2010
Tatra Mountains northern slope	49.4198	20.1671	Maunder Minimum first	1662	1663		TRW	Very cold summer,rockfall catastrophe	Cold	Humid	Poland	Southern Poland	Summer	Temperature	Terrestrial	Niedzwiedz 2010
Tatra Mountains northern slope	49.4198	20.1671	Maunder Minimum first	1675			TRW	Cold summer	Cold	Humid	Poland	Southern Poland	Summer	Temperature	Terrestrial	Niedzwiedz 2010
Tatra Mountains northern slope	49.4198	20.1671	Late Maunder Minimum warm phase	1676	1688		TRW	Very warm summer	Warm	Dry	Poland	Southern Poland	Summer	Temperature	Terrestrial	Niedzwiedz 2010
Poland	50.0647	19.945		1676			PDSI	Megadrought		Dry	Poland		Summer	Precipitation	Terrestrial	Cook 2015
Tatra Mountains northern slope	49.4198	20.1671	Late Maunder Minimum warm phase	1683	1684		TRW	Very warm summer	Warm	Dry	Poland	Southern Poland	Summer	Temperature	Terrestrial	Niedzwiedz 2010
Poland	50.0647	19.945		1683	1684		PDSI	Megadrought		Dry	Poland		Summer	Precipitation	Terrestrial	Cook 2015
Tatra Mountains northern slope	49.4198	20.1671	Late Maunder Minimum	1687	1460		TRW	Warm summer	Warm		Poland	Southern Poland	Summer	Temperature	Terrestrial	Niedzwiedz 2010
Tatra Mountains northern slope	49.4198	20.1671	Late Maunder Minimum cool phase	1689	1699		TRW	Cold summer	Cold		Poland	Southern Poland	Summer	Temperature	Terrestrial	Niedzwiedz 2010
Tatra Mountains northern slope	49.4198	20.1671	Late Maunder Minimum	1695	1837		TRW	Cold summer	Cold		Poland	Southern Poland	Summer	Temperature	Terrestrial	Niedzwiedz 2010
Tatra Mountains northern slope	49.4198	20.1671	Late Maunder Minimum cool phase	1695	1820		TRW	Cold summer,volcano	Cold	Humid	Poland	Southern Poland	Summer	Temperature	Terrestrial	Niedzwiedz 2010
Tatra Mountains northern slope	49.4198	20.1671	Late Maunder Minimum last phase	1700	1715		TRW	Relatively warm	Warm		Poland	Southern Poland	Summer	Temperature	Terrestrial	Niedzwiedz 2010
Tatra Mountains northern slope	49.4198	20.1671	Late Maunder Minimum last phase	1702	1780		TRW	Warm summer	Warm		Poland	Southern Poland	Summer	Temperature	Terrestrial	Niedzwiedz 2010
Fennoscandia	59.5	20	Dark Ages Cold Period	1703	1050		TRW		Warm	Dry	Finland	South Finland	Season	Temperature	Terrestrial	Briffa 1990
Tatra Mountains northern slope	49.4198	20.1671	Late Maunder Minimum last phase	1709	1750		TRW	Cold summer	Cold	Dry	Poland	Southern Poland	Summer	Temperature	Terrestrial	Niedzwiedz 2010
Tatra Mountains	49.3191	19.8767	Medieval Climatic Anomaly	1712	1275		TRW		Hot	Humid	Slovakia	North Slovakia	Summer	Temperature	Terrestrial	Buntgen 2013
Tatra Mountains northern slope	49.4198	20.1671	Late Maunder Minimum last phase	1716	1789		TRW	Warm summer,high solar activity	Warm	Dry	Poland	Southern Poland	Summer	Temperature	Terrestrial	Niedzwiedz 2010
Tatra Mountains northern slope	49.4198	20.1671	Late Maunder Minimum last phase	1716			TRW	Cold summer frost	Cold		Poland	Southern Poland	Summer	Temperature	Terrestrial	Niedzwiedz 2010
Tatra Mountains lower parts	55.5052	25.421	Medieval Climatic Anomaly	1724			TRW	Cold summer	Cold		Poland	Southern Poland	Summer	Temperature	Terrestrial	Niedzwiedz 2004
Tatra Mountains northern slope	49.4198	20.1671	Late Maunder Minimum last phase	1737	1739		TRW	Warm summer	Warm	Dry	Poland	Southern Poland	Summer	Temperature	Terrestrial	Niedzwiedz 2010
Tatra Mountains	49.3191	19.8767	Medieval Climatic Anomaly	1738	850		TRW		Hot	Dry	Slovakia	North Slovakia	Summer	Temperature	Terrestrial	Buntgen 2013
Lake Zabinskie	53.5863	22.6785	Medieval Climatic Anomaly	1740	1780		Chrysophytes		Warm	Dry	Lithuania	Lithuania	Winter	Temperature	Lake	Hernandez Almeida 2015
Tatra Mountains northern slope	49.4198	20.1671	Late Maunder Minimum last phase	1741	1745		TRW	Cold summer	Cold	Dry	Poland	Southern Poland	Summer	Temperature	Terrestrial	Niedzwiedz 2010
Tatra Mountains northern slope	49.4198	20.1671		1741	1157		TRW	Cold summer	Cold		Poland	Southern Poland	Summer	Temperature	Terrestrial	Niedzwiedz 2010
Tatra Mountains	49.3191	19.8767		1748	1650		TRW		Hot		Slovakia	North Slovakia	Summer	Temperature	Terrestrial	Buntgen 2013
Poland	50.0647	19.945		1748			PDSI	Megadrought	Warm	Dry	Poland	South Finland	Summer	Precipitation	Terrestrial	Cook 2015
Fennoscandia	59.5	20		1748	1767		TRW		Warm		Finland	South Finland	Season	Temperature	Terrestrial	Briffa 1990
Fennoscandia	59.5	20		1750	1770		TRW	Extremely warm	Warm		Finland	South Finland	Season	Temperature	Terrestrial	Briffa 1990
Tatra Mountains	49.3191	19.8767		1751			TRW		Cold		Slovakia	North Slovakia	Summer	Temperature	Terrestrial	Buntgen 2013
Tatra Mountains	49.3191	19.8767		1757			TRW		Hot		Slovakia	North Slovakia	Summer	Temperature	Terrestrial	Buntgen 2013
Central Europe	49.2254	16.5938		1761			TRSI		Warm		Czech Republic,North Eastern Austria	South Finland	Summer	Temperature	Terrestrial	Torbenson 2023
Fennoscandia	59.5	20		1761			TRW		Warm		Finland	South Finland	Season	Temperature	Terrestrial	Briffa 1990
Tatra Mountains northern slope	49.4198	20.1671	Late Maunder Minimum last phase	1762	1772		TRW	Cold summer	Cold		Poland	Southern Poland	Summer	Temperature	Terrestrial	Niedzwiedz 2010
Tatra Mountains	49.3191	19.8767		1774			TRW		Hot		Slovakia	North Slovakia	Summer	Temperature	Terrestrial	Buntgen 2013
Tatra Mountains	49.3191	19.8767		1786			TRW		Cold		Slovakia	North Slovakia	Summer	Temperature	Terrestrial	Buntgen 2013
Tatra Mountains northern slope	49.4198	20.1671	Dalton Minimum	1790	1820		TRW	Cold summer	Cold		Poland	Southern Poland	Summer	Temperature	Terrestrial	Niedzwiedz 2010
Tatra Mountains	49.3191	19.8767		1794			TRW		Cold		Slovakia	North Slovakia	Summer	Temperature	Terrestrial	Buntgen 2013
Lake Zabinskie	53.5863	22.6785	Dalton Minimum	1800	1820		Chrysophytes	Extremely warm	Cold	Humid	Poland	North Poland	Winter	Temperature	Lake	Hernandez Almeida 2015
Tatra Mountains northern slope	49.4198	20.1671	Dalton Minimum	1805	1767		TRW	Cold summer	Cold		Poland	Southern Poland	Summer	Temperature	Terrestrial	Niedzwiedz 2010
Central Europe	53.5863	22.6785		1808	1837		TRW		Cold		Slovakia	North Slovakia	Summer	Temperature	Terrestrial	Buntgen 2013
Tatra Mountains	49.3191	19.8767		1811	1106		TRW		Cold		Slovakia	North Slovakia	Summer	Temperature	Terrestrial	Buntgen 2013
Tatra Mountains	49.3191	19.8767		1813	1570		TRW		Cold		Slovakia	North Slovakia	Summer	Temperature	Terrestrial	Buntgen 2013
Tatra Mountains	49.3191	19.8767		1814	1146		TRW	Extremely cold	Cold		Slovakia	North Slovakia	Summer	Temperature	Terrestrial	Buntgen 2013
Tatra Mountains northern slope	49.4198	20.1671	Dalton Minimum	1816	814		TRW	Cold summer	Cold		Poland	Southern Poland	Summer	Temperature	Terrestrial	Niedzwiedz 2010
Central Europe	49.2254	16.5938		1822	1620		TRSI		Warm		Czech Republic,North Eastern Austria	South Finland	Summer	Temperature	Terrestrial	Torbenson 2023
Fennoscandia	59.5	20		1831	867		TRW		Warm		Finland	South Finland	Season	Temperature	Terrestrial	Briffa 1990
Tatra Mountains	49.3191	19.8767		1832	1363		TRW		Cold		Slovakia	North Slovakia	Summer	Temperature	Terrestrial	Buntgen 2013
Tatra Mountains	49.3191	19.8767		1836	1473		TRW	Megadrought	Cold		Slovakia	North Slovakia	Summer	Temperature	Terrestrial	Buntgen 2013
Tatra Mountains	49.3191	19.8767	Little Ice Age	1837			TRW		Cold		Slovakia	North Slovakia	Summer	Temperature	Terrestrial	Buntgen 2013
