# Supplementary material for: The shifting of buffer crop repertoires in pre-industrial north-eastern Europe
Source: Sci Rep. 2025 Jan 29;15:3720. doi: 10.1038/s41598-025-87792-0 (PMC11779896; doi:10.1038/s41598-025-87792-0)
Supplement: Supplementary file 3 — Supplementary Material 3 [file 41598_2025_87792_MOESM3_ESM.xlsx]

## Sheet: Arkusz 1 - piotr_millet_7 (1)
Year	Manorial farm_historical name	Geographic.coordinates..google.	% Rye	% Oats	% Millet	% Buckwheat	% Hemp
1768	Miedniki	54.538889, 25.650000	36.9231	61.5385	0	1.53846	0
1768	Wysoki Dwór	54.580556, 24.527778	58.6207	34.4828	0	6.89655	0
1768	Dryświaty	55.588889, 26.666667	100	0	0	0	0
1597	Czerewaszyce	52.208333, 24.227500	74.0681	21.0697	0	4.86224	0
1597	Wieżki	52.283611, 24.118333	65.3409	27.8409	0	6.81818	0
1597	Prużana	52.550000, 24.466667	58.3942	32.1168	0	9.48905	0
1597	Czachec	52.492500, 24.419167	78.9474	21.0526	0	0	0
1597	Horodec	52.241028, 24.731111	76.7442	23.2558	0	0	0
1618	Kobryń	52.216667, 24.350000	64.6154	27.6923	0	7.69231	0
1618	Czerewaszyce	52.208333, 24.227500	69.8283	27.8005	0	2.37122	0
1618	Wieżki	52.283611, 24.118333	48.5612	47.9616	0.119904	3.35731	0
1618	Czachec	52.492500, 24.419167	62.8131	29.2871	0.192678	7.70713	0
1618	Prużana	52.550000, 24.466667	74.3692	18.0611	0.132802	7.43692	0
1618	Horodec	52.241028, 24.731111	56.5217	37.2671	0	6.21118	0
1588	Kijowiec	52.069444, 23.367222	50	30	0	20	0
1588	Wohyń	51.756667, 22.781944	60	30	0	10	0
1588	Kodeń	51.911111, 23.602500	50	42.8571	0	7.14286	0
1588	Połowce	52.484444, 23.366944	47.4576	42.3729	0	10.1695	0
1588	Rzeczyca	51.962222, 22.750000	52	48	0	0	0
1616	Zelwa	53.150000, 24.816667	75.3564	24.6436	0	0	0
1578	Horodnica	53.683000, 23.829972	55.6188	39.0341	0	5.34714	0
1578	Nowy Dwór	53.632500, 23.542778	60	37.5	0	2.5	0
1578	Kotra	53.585556, 24.188611	64.4752	27.6817	0	7.84314	0
1578	Odelsk	53.405556, 23.762500	53.0069	39.9027	0	7.09041	0
1578	Łabno	53.703056, 23.647778	24.6291	71.2166	0	4.1543	0
1578	Jeziora	53.716667, 24.183333	70.3704	27.7778	0	1.85185	0
1578	Mosty	53.400000, 24.533333	69.7417	22.1402	0	8.11808	0
1578	Wiercieliszki	53.698611, 24.016111	53.7308	38.8236	0	7.44562	0
1578	Świsłocz	53.033333, 24.100000	55.7895	35.7895	0	8.42105	0
1578	Krynki	53.265278, 23.772194	62.9787	27.234	0	9.78723	0
1650	Horodnica	53.683000, 23.829972	55.1783	38.2003	0	6.62139	0
1650	Wiercieliszki	53.698611, 24.016111	96.0118	0	0	3.98818	0
1650	Jeziora	53.716667, 24.183333	91.1854	0	0	8.81459	0
1650	Skidel	53.586111, 24.251944	80.7453	8.69565	0	10.559	0
1650	Kotra	53.585556, 24.188611	50	32.1429	0	17.8571	0
1650	Kraśnik	53.450000, 24.266667	56	36	0	8	0
1650	Łabno	53.703056, 23.647778	60.9137	30.4569	0	8.62944	0
1650	Odelsk	53.405556, 23.762500	54.0541	33.7838	0	12.1622	0
1650	Kwasów	53.514167, 23.996944	54.6218	29.4118	0	15.9664	0
1650	Nowy Dwór	53.632500, 23.542778	50.1931	44.4015	0	5.40541	0
1680	Rzeczyca	51.962222, 22.750000	66.6667	26.6667	0	6.66667	0
1680	Przyłuki	51.986944, 23.702222	60	33.3333	0	6.66667	0
1680	Krzywowierzba	51.591944, 23.192222	50.9901	39.604	0	9.40594	0
1680	Wohyń	51.756667, 22.781944	59.322	33.8983	0	6.77966	0
1786	Rzeczyca	51.962222, 22.750000	62.8362	34.4254	0	2.73839	0
1786	Przyłuki	51.986944, 23.702222	55.9701	35.5721	0	8.20896	0.248756
1786	Gierszonowicze	location not identified	82.3171	0	0.609756	17.0732	0
1786	Zburaż	51.769444, 23.975000	70.6818	20.6818	0.151515	8.48485	0
1786	Ołtusz	51.687778, 23.967222	79.6875	19.5312	0.292969	0	0.488281
1786	Dywin	51.950000, 24.566667	70.5038	25.8936	0.112581	2.9271	0.562905
1786	Ostrów	52.187778, 23.321667	58.998	37.3211	0.204499	3.06748	0.408998
1786	Stara wieś	52.087222, 24.099167	72.3926	20.2454	0.490798	6.62577	0.245399
1786	Osiaty	52.098694, 24.140472	69.7229	27.6071	0.251889	2.41814	0
1786	Ruda	51.638611, 23.953056	65.5356	22.1037	0.121183	10.9064	1.33301
1786	Radesz	51.708889, 23.821389	64.5161	33.871	0	0	1.6129
1786	Saki	52.628056, 23.334167	69.8925	25.1447	0.413565	4.13565	0.413565
1786	Adamków	52.846667, 24.651667	73.3268	24.0157	0.492126	0	2.16535
1786	Pełczyce	location not identified	68.2068	22.5523	0.440044	8.36084	0.440044
1786	Łomazy	51.902778, 23.174722	61.8772	26.6512	0.115875	10.4287	0.926999
1786	Wiski	51.799167, 22.970833	46.0929	49.5139	0	4.03313	0.360101
1786	Wohyń	51.756667, 22.781944	55.1663	34.7387	0	9.50119	0.593824
1786	Krzywowierzba	51.591944, 23.192222	43.6517	49.9817	0	5.63483	0.731797
1786	Trojanów	51.943889, 23.464444	53.7387	39.8649	0.18018	5.63063	0.585586
1786	Piszczac	51.981111, 23.374444	49.7573	42.4757	0.161812	6.87702	0.728155
1786	Kijowiec	52.069444, 23.367222	56.7147	38.3862	0	4.61095	0.288184
1786	Kobylany	52.043056, 23.561667	54.3478	39.7301	0.149925	4.49775	1.27436
1786	Milejczyce	52.519722, 23.132222	72.8274	24.4798	0.244798	2.44798	0
1786	Pużyce	location not identified	68.8944	20.7096	0.0825083	9.90099	0.412541
1786	Połowiec	52.484444, 23.366944	36.7466	58.7146	0.0726216	3.99419	0.472041
1786	Omelaniec	52.471389, 23.509444	56.5217	30.4348	0	13.0435	0
1786	Dubiny	52.119722, 24.695556	47.9946	48.2665	0	3.39905	0.339905
1786	Plesiszcza	location not identified	64.8273	23.3288	0.179453	10.7672	0.897263
1786	Dabrowa	location not identified	81.6233	16.8453	0	1.53139	0
1786	Załawie	52.100278, 25.156389	75.3086	12.3457	0	12.3457	0
1786	Prużana	52.550000, 24.466667	53.4778	41.5431	0.0380084	4.65602	0.285063
1786	Olita	54.396000, 24.046000	77.6262	19.1542	0	1.52797	1.69168
1786	Dobkiszki	54.363000, 23.816000	44.8522	49.4393	0	5.1648	0.543663
1786	Krakopol	54.436111, 23.763889	19.0355	79.9492	0	0	1.01523
1786	Rudawski	54.470833, 23.628611	50.9415	48.4733	0	0.203562	0.381679
1786	Krasna	54.377778, 23.530556	52.0295	41.6974	0	5.53506	0.738007
1786	Gulbiniszki	54.483333, 23.352778	49.0798	47.2393	0	3.27198	0.408998
1786	Skirsobole	54.431000, 23.403000	50.7143	47.619	0	1.66667	0
1786	Janówka	54.453056, 23.206111	91.8367	3.82653	0	3.82653	0.510204
1786	Parysowszczyzna	54.555556, 23.169444	56.9801	34.188	0	8.54701	0.2849
1786	Wołowicze	54.491944, 23.203056	47.2798	52.4611	0	0	0.259067
1786	Bartniki	54.505556, 23.027778	46.1858	52.1899	0	1.50403	0.120322
1786	Królowokrzesielski	54.286111, 23.330556	51.321	46.7116	0	1.18044	0.786959
1786	Pojewony	54.531111, 22.828056	62.7075	35.6066	0	1.27714	0.408685
1786	Turów	54.148333, 22.820000	39.91	53.9173	0	6.14769	0.0249906
1786	Suchorzec	54.136667, 22.706667	51.8356	45.3723	0	2.79214	0
1786	Szczebra	53.905556, 22.976111	42.8279	56.1475	0	1.02459	0
1786	Pomorze	54.058889, 23.363889	51.8672	41.1746	0	5.36227	1.59591
1786	Szawle	55.933333, 23.316667	70.0219	28.884	0	1.09409	0
1786	Klucz gitarski	55.857000, 23.146000	62.9286	37.0714	0	0	0
1786	Radziwiliszki	55.816667, 23.533333	58.9474	39.0977	0	1.95489	0
1786	klucz pojeziorski	55.914000, 23.506000	57.371	41.769	0	0.859951	0
1786	Grużdże	56.100000, 23.252778	61.7021	34.4294	0	3.86847	0
1786	klucz gurbowski	55.473056, 26.270000	41.25	58.75	0	0	0
1786	Berżany	55.827778, 22.816667	61.0442	38.9558	0	0	0
1786	Werbuny	56.024000, 23.179000	68.561	29.6059	0	1.83318	0
1786	Klucz Piktuyki	56.154000, 23.197000	77.4194	22.5806	0	0	0
1786	klucz mietlicki	56.200000, 23.566667	55.9671	43.2099	0	0.823045	0
1786	Sawgieliszki	56.252000, 23.699000	100	0	0	0	0
1786	Wajżgucie	56.159000, 23.576000	53.1539	43.4819	0	3.36417	0
1786	klucz szyklewski	56.121000, 23.720000	59.3438	37.8031	0	2.85307	0
1786	Pomusze	56.092000, 23.665000	61.0619	33.1858	0	5.75221	0
1786	Degucie	55.938000, 23.634000	58.2372	41.3509	0	0.411862	0
1786	klucz juchnajski	56.011000, 23.548000	59.252	40.748	0	0	0
1786	Meszkucie	56.070000, 23.475000	44.086	51.0753	0	4.83871	0
1786	Najsiów	56.021000, 23.517000	77.93	21.309	0	0.761035	0
1786	Żagory	56.366667, 23.250000	27.7457	72.2543	0	0	0
1786	Żadejki	56.282000, 23.316000	73.2955	26.2784	0	0	0.426136
1786	klucz nadkurlandzki	56.308333, 23.383333	54.6209	45.3791	0	0	0
1786	klucz waluński	56.244000, 23.478000	83.6409	15.9396	0	0.419463	0
1786	Satkuny	56.284000, 23.630000	54.7554	45.2446	0	0	0
1786	klucz kalwiowski	56.338000, 23.665000	58.8608	37.9747	0	3.16456	0
1786	klucz posydobrski	56.153000, 23.436000	68.2249	30.0063	0	1.76879	0
1786	Jordaaycie	56.227000, 23.361000	68.9189	31.0811	0	0	0
1789	Jasmony	54.018611, 29.550833	49.0463	35.4223	0.13624	14.6458	0.749319
1789	Berezyno	53.833333, 28.983333	58.9812	26.8097	0	14.2091	0
1789	Domatkanowicze	53.113611, 26.557500	73.5655	12.7513	0.245218	11.7705	1.66748
1789	A1	52.402778, 29.373333	74.1935	12.9032	0.645161	10.9677	1.29032
1789	A2	52.278611, 29.356667	69.3548	22.5806	0.322581	6.77419	0.967742
1789	Kislakówka	52.093333, 29.180278	57.1429	29.3651	0	12.6984	0.793651
1789	Ozarzyce	52.245833, 29.225000	62.0225	24.9438	0.449438	10.7865	1.79775
1789	Szyicze	52.133333, 29.333333	66.8246	18.0956	0.430849	13.7872	0.861698
1789	A3	52.279444, 31.263333	57.554	28.777	0.359712	12.5899	0.719424
1789	A4	52.313611, 29.328611	54.2683	35.9756	0	9.14634	0.609756
1789	Zahalle	51.908333, 29.807500	48.1144	37.4512	0.390117	13.0039	1.04031
1765	Stetyczów	52.063056, 26.133333	66.9302	22.1344	0.395257	10.5402	0
1765	Kużelczyn	52.030556, 25.586111	52.4513	30.7147	0.0590667	16.3024	0.472534
1765	Kanatop	52.419444, 26.397222	58.6826	16.7665	0	23.9521	0.598802
1765	Obrów	52.509444, 25.558333	40.1691	38.4778	0	21.1416	0.211416
1765	Łohiszyn	52.333333, 25.983333	62.4746	32.4544	0	4.86815	0.20284
1765	Drużyłowicze	52.24, 25.556944	60.2362	31.4961	0	7.87402	0.393701
1765	Rahodoszcz	52.039644, 25.471572	56.9921	21.1082	0	21.1082	0.791557
1765	Lachowicze	53.033333, 26.266667	55.1867	27.3859	0.414938	17.0124	0
1765	Mokra Dąbrowa	52.345833, 26.066667	57.9627	41.6069	0.143472	0	0.286944
1765	Żołkinie	51.907778, 26.336667	53.7815	32.2689	0.168067	13.4454	0.336134
1786	Janów	53.467222, 23.230833	50.7815	48.2667	0	0.951739	0
1786	Kuplisk	53.486389, 23.263611	53.5687	45.7409	0	0.690429	0
1786	Połomin	53.544444, 23.251667	65.5015	31.7629	0	2.73556	0
1786	Grodzisk	53.637778, 23.186111	49.0385	48.1971	0	2.76442	0
1786	Ostrówek	53.285556, 23.701111	75.8032	22.2892	0	1.90763	0
1786	Dubasiewszczyzna	53.545833, 23.148056	61.5724	35.3357	0	3.09187	0
1786	Kumiała	53.461111, 23.095556	62.5343	34.8005	0	2.66525	0
1786	Czerlona	53.502778, 24.286389	56.7753	39.7942	0	3.43053	0
1786	Kupowo	54.303333, 23.057500	55.8195	38.0048	0	6.17577	0
1786	Kalmeńsk	53.651667, 23.346389	55.4174	42.6288	0	1.95382	0
1786	Kamień	53.688611, 23.295556	65.3938	31.5036	0	3.10263	0
1786	Lipsk	53.733611, 23.399722	66.14	19.4131	0	14.447	0
1786	Perstun	53.788889, 23.616944	69.4656	21.374	0	9.16031	0
1786	Łabno	53.703056, 23.647778	60.3618	34.5395	0	5.09868	0
1786	Nowy Dwór	53.632500, 23.542778	67.9042	25.3892	0	6.70659	0
1786	Harasimowicze	53.660833, 23.422500	57.1429	41.4286	0	1.42857	0
1786	Suchodolina	53.611944, 23.301111	53.9683	43.8095	0	2.22222	0
1786	Dubaśno	53.657222, 23.485833	63.1579	28.7719	0	8.07018	0
1786	Zaścianki	53.600000, 23.377500	67.0886	30.3797	0	2.53165	0
1786	Szostaków	53.586944, 23.446389	72.973	25.2252	0	1.8018	0
1786	Jstrzębna	53.728056, 23.235000	55.5909	36.5311	0	7.87802	0
1786	Suchabala	53.798056, 23.664444	78.9474	19.1388	0	1.91388	0
1786	Reszkowce	53.566667, 23.346944	50.4687	46.6817	0	2.84964	0
1786	Rochaczów	location not identified	63.6364	27.2727	0	9.09091	0
1786	Rymanówka	53.536944, 23.324722	58.371	38.914	0	2.71493	0
1770	Saczewo	55.600000, 31.200000	29.0352	61.9055	0	9.05934	0
1770	Marienhaus	57.183333, 27.683333	54.8117	44.3515	0	0.83682	0
1770	Lipno	location not identified	48.4848	49.2424	0	0	2.27273
1770	Bołowski	location not identified	48.5584	49.3171	0	0.60698	1.51745
1770	Bałtynów	location not identified	46.729	51.4019	0	0.778816	1.09034
1641	Basławce	53.067089, 27.279445	67.3065	26.1376	0	6.51298	0.0428486
1641	Wańkowszczyzna	53.015096, 27.352203	53.7102	24.735	0	21.3781	0.176678
1767	Berezowiec	53.523056, 26.171667	64.8241	34.1709	0	0.251256	0.753769
1676	Birże	56.200000, 24.750000	50.5528	49.4472	0	0	0
1676	Nierodów	56.189090, 24.698389	47.0888	52.1794	0	0.636335	0.0954502
1676	Porawica	56.245047, 24.861450	38.392	61.5238	0	0	0.0842791
1761	Wiżunki	location not identified	82.7493	15.0943	0	2.15633	0
1761	Lipsk	55.304783, 23.861321	74.3363	24.7788	0	0.884956	0
1761	Gierszleciszki	56.187757, 24.609503	42.9722	55.3506	0	1.67729	0
1761	Bobordzki folwark	55.448108, 24.033884	34.4262	65.5738	0	0	0
1761	Szetenszny	location not identified	53.2544	44.3787	0	2.36686	0
1761	Urbaniszki	55.370355, 24.005127	54.7945	41.0959	0	4.10959	0
1761	Nielubiszki	location not identified	48.0769	48.0769	0	3.84615	0
1761	Sagajliszki	location not identified	44.4444	55.5556	0	0	0
1761	Siemiaszyszki	55.884405, 24.001065	75	25	0	0	0
1542	Krekgużyn	54.883333, 24.850000	98.0392	0	0	1.96078	0
1542	Wilekiszki	54.990000, 24.881000	50	50	0	0	0
1542	Muśniki	54.947222, 24.841667	90.9091	2.27273	0	6.81818	0
1542	Wepraty	54.947222, 24.841667	53.7634	41.9355	0	4.30108	0
1554	Łyngmiany	55.318889, 25.956111	58.6047	35.3488	0	6.04651	0
1563	Panevėžiukas	55.143889, 23.788889	52.8302	37.7358	0	9.43396	0
1574	Kielmy	55.633333, 22.933333	20.6751	67.5105	0	11.8143	0
1574	Podubiszki	55.619000, 22.913000	25	60.7143	0	14.2857	0
1582	Szlenowo	54.868056, 24.091111	75.7576	13.6364	0	10.6061	0
1584	Pieštuvėnai	54.626735, 24.310958	33.3333	66.6667	0	0	0
1585	Paįstrys	55.844000, 24.338000	64.7502	29.4062	0	5.84354	0
1588	Milkuvos	55.021910, 23.804309	62.5	25	0	12.5	0
1589	Gauryliai 1	56.177729, 22.354551	74.4186	23.2558	0	2.32558	0
1589	Gauryliai 2	56.169835, 22.430109	85.7143	12.987	0	1.2987	0
1593	Jaunodava	55.612849, 22.474755	100	0	0	0	0
1598	Ilga	55.312426, 24.576405	72.093	27.907	0	0	0
1599	Żorany	55.840208, 22.210158	42.6667	53.3333	0	4	0
1553	Bolniki	55.293276, 25.120544	75.1852	19.2593	0	5.55556	0
1642	Gruziai	56.109196, 24.160924	47.3684	52.6316	0	0	0
1647	Varputenai	55.880978, 22.890876	45.1327	53.0973	0	1.76991	0
1649	Waka	54.580977, 25.215784	67.7852	26.8456	0	5.36913	0
1650	Świętojeziory	54.243460, 23.648292	46.678	51.1073	0	2.21465	0
1652	Raudadvaras	54.827397, 25.282216	56.1644	41.0959	0	2.05479	0.684932
1653	Gaveikenai	55.346112, 26.107793	43.6364	43.6364	0	12.7273	0
1653	Kundrenai	55.702980, 24.029085	56.25	37.5	0	6.25	0
1653	Taurogi	55.250206, 22.292125	62.5	32.7381	0	4.46429	0.297619
1661	Varputenai	55.881002, 22.889675	93.0233	0	0	6.97674	0
1662	Butkojcie	55.245911, 22.809680	35.9073	61.7761	0	2.3166	0
1665	Giełgudyszki	55.080139, 22.977365	62.9921	36.7454	0	0	0.262467
1665	Naruny	54.783417, 25.283358	61.1111	37.037	0	1.5873	0.26455
1665	Swiatosino	55.064798, 23.403174	51.6129	48.3871	0	0	0
1668	Bujwidze	54.836115, 25.731339	74.7967	17.0732	0	8.13008	0
1673	Sołomieście	55.940725, 24.872850	41.4085	56.338	0	2.25352	0
1680	Kamaika	55.008229, 24.636810	81.1475	18.8525	0	0	0
1684	Ritine	56.387902, 22.031071	43.5644	51.4851	0	4.9505	0
1686	Suderwa	54.779965, 25.092998	61.3793	37.2414	0	1.37931	0
1688	Merkinie	54.458410, 25.474694	61.5385	37.6068	0	0.854701	0
1688	Gurstoniu	54.929644, 24.972283	49.4845	49.4845	0	1.03093	0
1689	Kościukiszki	54.902436, 24.540128	59.4937	37.9747	0	2.53165	0
1691	Korwie	54.876022, 25.131982	61.5385	36.9231	0	1.53846	0
1692	Zudzigole	55.721364, 24.859430	74.0741	22.2222	0	3.7037	0
1693	Sawiciszki	55.732449, 24.315690	50.3597	43.1655	0	6.47482	0
1694	Maguny	54.888767, 25.758669	48.9559	46.4037	0	4.64037	0
1694	Gineiciszki	54.523322, 24.425827	56.899	28.4495	0	14.2248	0.426743
1695	Fedoryszki	56.052108, 24.177920	50	50	0	0	0
1696	Swincianki	55.134750, 26.158797	43.3604	47.6965	0	8.67209	0.271003
1696	Kulwa	55.108426, 24.176834	52.1739	46.087	0	1.73913	0
1698	Pomusze	55.355832, 24.793335	58.3333	41.6667	0	0	0
1700	Papalcie	55.523595, 24.042719	49.0196	49.0196	0	1.96078	0
1597	Kobryń	52.216667, 24.350000	84.7458	0	0	15.2542	0
1680	Ruda	51.638611, 23.953056	58.4371	6.34202	0	35.2208	0
1611	Polikowicze	location not identified	58.8235	32.9013	0	7.37787	0.897308
1581	Olita	54.396000, 24.046000	65.3846	24.0385	0	10.5769	0
1581	Wronowo	54.333333, 23.897222	52.9617	43.1185	0	3.91986	0
1581	Krakopol	54.436111, 23.763889	36.1446	60.241	0	3.61446	0
1636	Berezowiec	53.523056, 26.171667	66.4557	32.9114	0	0	0.632911
1590	Vilijos	55.035729, 23.602776	46.9194	47.3934	0	5.6872	0
1591	Kvedarno	55.556277, 22.000538	52.7778	27.7778	0	19.4444	0
